# Supplementary material for: Knowledge, attitude and prevalence of hepatitis B virus among healthcare workers: a cross-sectional, hospital-based study in Bamenda Health District, NWR, Cameroon
Source: PubMed Central journal article supplement — BMJ Open. 2020 Mar 18;10(3):e031075. doi: 10.1136/bmjopen-2019-031075 (PMC7150593; doi:10.1136/bmjopen-2019-031075), 2020-03-18
Supplement: bmjopen-2019-031075.draft_revisions.pdf [file bmjopen-2019-031075.draft_revisions.pdf]

# BMJ Open

BMJ Open is committed to open peer review. As part of this commitment we make the peer review history of every article we publish publicly available.

When an article is published we post the peer reviewers' comments and the authors' responses online. We also post the versions of the paper that were used during peer review. These are the versions that the peer review comments apply to.

The versions of the paper that follow are the versions that were submitted during the peer review process. They are not the versions of record or the final published versions. They should not be cited or distributed as the published version of this manuscript.

BMJ Open is an open access journal and the full, final, typeset and author-corrected version of record of the manuscript is available on our site with no access controls, subscription charges or pay-per-view fees (<http://bmjopen.bmj.com>).

If you have any questions on BMJ Open's open peer review process please email [info.bmjopen@bmj.com](mailto:info.bmjopen@bmj.com)

# BMJ Open

## KNOWLEDGE, ATTITUDE AND PREVALENCE OF HEPATITIS B VIRUS AMONG HEALTH CARE WORKERS IN THE BAMENDA HEALTH DISTRICT, NORTH WEST REGION, CAMEROON

|                               |                                                                                                                                                                                                                                                                                                                                                                                                                                                                                       |
|-------------------------------|---------------------------------------------------------------------------------------------------------------------------------------------------------------------------------------------------------------------------------------------------------------------------------------------------------------------------------------------------------------------------------------------------------------------------------------------------------------------------------------|
| Journal:                      | <i>BMJ Open</i>                                                                                                                                                                                                                                                                                                                                                                                                                                                                       |
| Manuscript ID                 | bmjopen-2019-031075                                                                                                                                                                                                                                                                                                                                                                                                                                                                   |
| Article Type:                 | Research                                                                                                                                                                                                                                                                                                                                                                                                                                                                              |
| Date Submitted by the Author: | 19-Apr-2019                                                                                                                                                                                                                                                                                                                                                                                                                                                                           |
| Complete List of Authors:     | Akazong, Etheline; University of Dschang Faculty of Sciences, Department of Biochemistry<br>Tume, Christopher; University of Dschang Faculty of Sciences, Department of Biochemistry; University of Bamenda, Department of Biochemistry<br>Njouom, Richard; Centre Pasteur Cameroun<br>Ayong, Lawrence; Centre Pasteur Cameroun<br>Fondoh, Victor; Regional Hospital Bamenda Laboratory<br>Kuiate, Jules-Roger; University of Dschang Faculty of Sciences, Department of Biochemistry |
| Keywords:                     | Health care workers, HBV, HBsAg, Attitude, Knowledge, Cameroon                                                                                                                                                                                                                                                                                                                                                                                                                        |
|                               |                                                                                                                                                                                                                                                                                                                                                                                                                                                                                       |

SCHOLARONE™  
Manuscripts

1  
2  
3 **KNOWLEDGE, ATTITUDE AND PREVALENCE OF HEPATITIS B VIRUS AMONG**  
4 **HEALTH CARE WORKERS IN THE BAMENDA HEALTH DISTRICT, CAMEROON.**  
5  
6  
7

8 Akazong Etheline<sup>1</sup>, Tume Christopher<sup>1,3</sup>, Njouom Richard<sup>2</sup>, Ayong Laurence<sup>2</sup>, Fondoh  
9 Victor<sup>4</sup>, Kuate Jules-Roger<sup>1\*</sup>.

10  
11  
12 <sup>1</sup> Department of Biochemistry, University of Dschang, Cameroon

13  
14 <sup>2</sup> Centre Pasteur of Cameroon, Yaoundé, Cameroon

15  
16 <sup>3</sup> Department of Biochemistry, University of Bamenda, Cameroon

17  
18 <sup>4</sup> Regional Hospital Bamenda Laboratory, Cameroon  
19

20  
21 Short title: Akazong *et al.*; 2018.  
22

23  
24 \*Corresponding Author

25  
26 Kuate Jules-Roger

27  
28 Department of Biochemistry

29  
30 University of Dschang

31  
32 BP 67, Dschang, Cameroon

33  
34 Fax: +237 234 691 506

35  
36 Tel: +237 699 679 135

37  
38 Email: [jules.kuate@univ-dschang.org](mailto:jules.kuate@univ-dschang.org)  
39  
40  
41  
42  
43  
44  
45  
46  
47  
48  
49  
50  
51  
52  
53  
54  
55  
56  
57  
58  
59  
60

## ABSTRACT

**Introduction:** HBV is a blood borne virus which can be transmitted via percutaneous and mucocutaneous exposure to infected body fluid. HCWs who continuously are exposed to different body fluids are at an increased risk of contracting and transmitting this virus. It is thus important to evaluate the knowledge and attitude of HCWs towards HBV, and the prevalence of HBV infection among them.

**Method:** This cross-sectional study was carried out between April and September, 2017. Overall, 398 HCWs were recruited for this study. Knowledge on the route of HBV transmission and attitude towards HBV was evaluated using a well-structured questionnaire. HBsAg positivity was obtained using the Monalisa HBsAg ULTRA kit (Bio-Rad). Data was analyzed using SPSS v. 20.

**Results:** Three hundred and thirty-eight (84.9%) HCWs had heard of HBV, 249 (62.6%) of them had adequate knowledge on the route of HBV transmission. Laboratory staffs and medical doctors were the most knowledgeable among biomedical workers and students (82.8% and 80%) respectively. Stigma rate was highest among nurses 87 (38.8%). Prevalence of HBsAg positivity was high 42 (10.6%) given that there is an efficient and available vaccine.

**Conclusion:** Knowledge on route of HBV transmission was fair, the level of stigmatization of HBV infected patients and the prevalence of HBV infection was high in this study. A sensitization campaign should be carried out to educate HCWs on HBV, thus reducing the level of stigma associated with HBV as well and the probability of contacting HBV as a nosocomial infection.

**Key words:** Health care workers, HBV, HBsAg, Attitude, Knowledge, Vaccination, Cameroon.

**Abbreviations:** HBV: Hepatitis B virus, MD: Medical doctor, Lab tech: Laboratory technician, HCWs: Health care workers

**Strength:** Monalisa™ HBsAg ULTRA ELISA kit with 100% sensitivity and specificity of 99.28% was used to determine current HBV infection. Thus the prevalence of those currently infected (HBsAg positive) reported in this can be considered to be almost exact.

1  
2  
3 **Limitation:** Information about vaccination status was self-reported and number of  
4 doses were not taken into consideration. Consequently, the number of HCWs with a  
5 protective level of HBV is actually lower than what is reported in this study.  
6  
7  
8  
9  
10  
11  
12  
13  
14  
15  
16  
17  
18  
19  
20  
21  
22  
23  
24  
25  
26  
27  
28  
29  
30  
31  
32  
33  
34  
35  
36  
37  
38  
39  
40  
41  
42  
43  
44  
45  
46  
47  
48  
49  
50  
51  
52  
53  
54  
55  
56  
57  
58  
59  
60

For peer review only

## INTRODUCTION

The hepatitis B virus (HBV) is an enveloped virus of the hepadnavirus family that infects the liver, causing hepatocellular necrosis and inflammation. HBV, spread by percutaneous or mucosal exposure to infected blood and various body fluids can either cause an acute or chronic disease (1). An estimated 257 million people are living with HBV (2), and about 20% to 30% of those who become chronically infected will develop complications. Currently available treatments fail to eradicate the virus in most of those treated, necessitating potentially lifelong treatment (3) and approximately 650,000 people die annually due to CHB (3). Cameroon, a sub-Saharan African country, is considered hyper-endemic with a prevalence rate of HBV infection estimated at 11.5% (4).

Health care workers (HCW) who are frequently in contact with blood and other body fluids in the course of their work are at higher risk of exposure to blood borne viral diseases such as HBV, HCV and HIV (5–7). Among the HCWs worldwide, about 2 million HCWs are exposed and about 70,000 are infected with HBV annually (7). The WHO global burden of the disease showed that 37% of HBV among HCWs was the result of occupational exposure resulting from sharps injuries to HCWs (2). More than 90% of these infections occur in developing countries (7). The risk of occupational infections in developing countries is intensified by a variety of factors, comprising but not restricted to, overcrowding in hospitals, lower HCWs:patient ratio, insufficient or absence of basic safety and protection equipment, reutilizing/reprocessing contaminated needles and sharp instruments and partial awareness of exposure-risk to blood and body fluid (5).

Although needle stick injury hepatitis sero-conversion is somewhat rare, the costs of treatment and anxiety about the possible consequences of an exposure are serious. This might be why some HCWs refuse to service patients with blood borne viral diseases such as HBV. Prevention through immunization and increasing knowledge thus stand out as the safest strategy against the high prevalence of viral hepatitis among HCWs. Knowing facts and having proper awareness, can influence the attitudes of HCWs and control the menace of the disease (8). A number of studies in Africa have evaluated the level of the knowledge, attitude, and practice of HCWs toward HBV and the vaccination status of HCWs (9–12). The low level of vaccination and the high prevalence of HBsAg

1  
2  
3 recorded in different studies might be related to the low level of knowledge on the route  
4 of transmission among HCWs (13–16).  
5  
6  
7

8 Prevention is still a recommended safeguard against epidemic of viral hepatitis.  
9 Knowledge and attitudes of the clinician play a key role in prevention and spread of  
10 infection. By knowing facts, having proper awareness, and attitudes the menace of this  
11 disease can be prevented to a great extent. Therefore, the objectives of the present  
12 study are to assess the knowledge and attitudes of HCWs regarding HBV, and to  
13 compare their knowledge and attitude score to the prevalence of HBV infection.  
14  
15  
16  
17  
18  
19

## 20 **MATERIALS AND METHODS**

### 21 **Study design and setting**

22 This cross-sectional hospital-based study was conducted among HCWs in the Bamenda  
23 health district, NWR of Cameroon. Samples were collected between April and  
24 September 2017, and included 22 health facilities in this health district (among which  
25 were 1 regional hospital, 3 CMAs, 6 mission hospitals, 5 government health centers and  
26 7 private hospitals). Testing stations were set up in the various wards in the health  
27 facilities.  
28  
29  
30  
31  
32  
33  
34  
35

### 36 **Ethical consideration**

37 Ethical clearance for the study was obtained from the National Ethics Committee of  
38 Cameroon (N°2017/02/871/CE/CNERSH/SP). Authorization to carry out research in  
39 the NWR was obtained from the regional delegation. Authorizations to access different  
40 hospitals were obtained from the directors or the in-charge of the hospitals.  
41 Authorization to access health centers was obtained from the District medical officer  
42 and the chief of centers of the health facilities. Written informed consent was obtained  
43 from each participant.  
44  
45  
46  
47  
48  
49  
50  
51

### 52 **Study participants**

53 All HCWs in the selected hospitals were informed and invited to participate in the study.  
54 HCWs in the study comprised of medical doctors, nurses, midwives, dentists,  
55 pharmacists, laboratory technicians, sanitary workers and biomedical students working  
56 in the Bamenda health district during the study period.  
57  
58  
59  
60

### Sample Size and Justification

Sample size was determined using the Population Proportion Sample Size formula proposed by Scott Smith (13),  $X = Z\text{-score} * SD * (1 - SD) / MOE$ . The proportion of HCWs in the North-West Region was obtained from a registry published in 2015 (14) which published the national proportions of HCWs per region. The confidence level was 95% giving a Z-Score of 1.96, a margin of error (MOE) of +/- 5 and a standard deviation (SD) of 0.5. Using this formula, the calculated sample size was 385 persons.

### Sample collection

Participants who consented to the study completed a structured questionnaire which was used to collect data on sociodemographic characteristics, HBV exposure risks, HBV vaccination and attitude towards HBV. The questionnaire was self-administered and contained both closed and open-ended questions to assess the perspectives of the respondents towards HBV. Participants who could read and write completed the form by themselves while those who could neither read nor write were assisted. Pre-designed and pre-tested, semi-structured questionnaire items with response options was developed based on KAP surveys with similar objectives (15–17). Serum was obtained from 4ml of blood collected from study participants into a red cap dry tube. Identification number was used to link participant's laboratory results and the questionnaire.

### Definition for scoring knowledge

Knowledge was assessed using 4 questions directly linked with the route of HBV infection. Adequate knowledge was when a correct answer was given to all four questions. This minimum of 4/4 defining a good level of knowledge may seem rigorous. However, this minimum level justified the affordable difficulty of the questions.

### Definition for scoring attitude

Attitude was assessed using 7 criteria: attitude towards HBV infected persons, quality of hygiene, frequency of glove use, frequency of needle stick injury, sexuality, vaccination status of the HCW and knowledge of HBV status. Attitude was considered positive when a participant was able to correctly give at least 6 of the 7 expected answers.



## HBV serology

HBsAg was tested using the MONOLISA HBsAg ULTRA ELISA kit from Bio-Rad (Marnes-La-Coquette-France), a fully multivalent assay showing high sensitivity in the detection of HBV mutants to determine those who were positive for HBsAg (6). ELISA assay was performed following the manufacturer's instructions.

## Statistical analysis

Data was analyzed using SPSS version 20.0 for Windows (SPSS, Chicago, Illinois, USA). Descriptive statistics for demographic characteristics, percentages for categorical variables, median and IQR for continuous variables were used to analyse the findings of the study. Pearson's Chi square ( $p < 0.05$ ) was used to assess the significance among study variables.

## RESULTS

### Socio-demographic characteristics of study participants

A total of 398 HCWs across the Bamenda Health District participated in this study. Among these, 272 (68.3%) were women; the (16-25) year old age group was the most represented 167 (42.0%), and median age was 27.0 years (IQR, 23 - 32 years) at 95%CI (Table I). Most participants were nurses (56.6% of workers and 55.7% of students), had worked for 2-4 years and lived in an urban setting (84.2%).

### Assessment of Knowledge

A total of 4 questions were used to assess knowledge of HCWs from different hospitals in this region on the route of HBV transmission (Table II). Three hundred and thirty-eight (84.9%) participants had heard of HBV. Most participants correctly identified sexual intercourse 313 (78.6%), kissing 299 (75.1%), mother-to-child transmission 298 (73.4 %) and contact with body fluid 324 (81.4 %) as routes of contamination with HBV. Among these, laboratory staffs were the most knowledgeable regarding HBV 63 (70.0%) while not up to 50% of cleaners had heard of HBV before this study (Table IV). Knowledge was significantly correlated to the level of education and HCWs category ( $p$ -value $<0.001$ ). Overall, these HCWs had an unsatisfactory level of knowledge on the route of HBV transmission 248 (62.3%). Knowledge on the route of HBV transmission

1  
2  
3 was higher among biomedical students 97 (65.1%) compared to the workers 151  
4 (60.6%). Prevalence of HBsAg positivity was higher among those with adequate  
5 knowledge on the route of HBV transmission 25 (59.5%) (Table V).  
6  
7  
8  
9

### 10 **Attitude of HCWS TO HBV**

11 Among the 398 HCWs, 270 (67.8%) HCWs had a positive attitude towards HBV infected  
12 persons (Table III). Majority of HCWs practiced safe hygiene 317 (79.6%) and wore  
13 gloves often 310 (77.9%) while administering treatment. Needle stick injury and  
14 promiscuity (defined as having more than 10 sex partners in your life time, having sex  
15 with prostitute(s), and/or one night stands) was highest among sanitary workers (3  
16 (6.8%) and 16 (36.4%) respectively). Only 175 (44.0) HCWs showed an overall positive  
17 attitude towards HBV (Table III). There was a significant correlation between HCWs  
18 category and attitude towards HBV (p-value=0.04) (Table IV). Prevalence of current  
19 HBV infection was lower among those with a positive attitude towards HBV 19 (45.2)  
20 (Table V).  
21  
22  
23  
24  
25  
26  
27  
28  
29  
30

### 31 **Prevalence of HBsAg among HCWs**

32 The prevalence of HBsAg positivity was 10.6% (Table IV). No statistically significant  
33 association was observed between HBsAg positivity and the different classes involved  
34 in this study. Females were 1.7 times more infected than males. Majority of those  
35 infected belonged to the (46-65) year age group 4 (16.7%), had worked for (5-9) years  
36 7 (12.7%), had an SRN/SRM certificate 9 (16.4), were nurses 28 (12.5) and lived in an  
37 urban setting 38 (11.3). No significant correlation was observed between knowledge on  
38 the route of HBV infection, attitude towards HBV and being positive for HBsAg (Table  
39 V).  
40  
41  
42  
43  
44  
45  
46  
47  
48

### 49 **DISCUSSION**

50 Exposure to blood-borne pathogens such as HBV infection remains a significant  
51 occupational hazard to HCWs, especially in countries where the prevalence of this  
52 infection is high. KAP studies among HCWs are necessary to evaluate and improve the  
53 awareness on the route of transmission, prevention and management of infectious  
54 diseases. This study was carried out to assess the knowledge, attitude and prevalence of  
55 HBV among HCWs in the Bamenda Health District, NWR, Cameroon.  
56  
57  
58  
59  
60

### ❖ Assessment of Knowledge

HCWs are at the fore front of health care provision and it is expected that they should know the routes of transmission of different infectious agents in order to protect their patients and themselves from nosocomial infections. Results of the current study revealed a significant correlation between HCWs category, level of education and knowledge on the route of HBV transmission. This may be because education trains individuals to acquire, evaluate and use information (18). This may justify the unequal access to and exploitation of educational resources which increases with level of education (19) as well as role in the health setting.

Even though majority of HCWs in this setting had heard of HBV infection prior to this study 338 (84.9%), only 248 (62.6%) of them had good knowledge on the route of HBV transmission. This is similar to the 62.5% obtained in Northern Tanzania (9) and the 58.7% obtained in the South West Region of Cameroon (20). However, this is higher than the 47.0% obtained in Yaoundé among HCWs (21), 52% obtained in North West, Ethiopia (10), the 29.9% obtained in Sierra Leone (11) and the 42.1% obtained in a rural population in the North West Region of Cameroon (22). According to Abongwa *et al.* (2016), the most probable reason for this low level of good knowledge could be inadequate health educative programs forcing the population to get information on HBV from friends and/or relatives (22). Getting information from friend, relatives and/or colleagues increases the probability of getting inappropriate information.

The level of current HBV infection was higher among those who had an adequate knowledge on the route of HBV transmission 25 (59.5%). This is contrary to what is anticipated (15) given that better knowledge on the route of disease transmission should help the individual take precautions against getting the infection in question. The disparity observed in this study can be justify by the fact that most of the infected HCWs were chronic carriers who after their first diagnosis or exposure to HBV were directed to gastroenterologist for follow-up.

### ❖ Assessment of Attitude of HCWs to HBV

There was a significant association between HCWs category and attitude towards HBV (p-value=0.04) and even though 270 (67.8%) HCWs had a positive attitude towards

1  
2  
3 HBV infected persons, only 175 (44.0%) HCWs showed an overall positive attitude  
4 towards HBV. The poor attitude of the majority of HCWs towards HBV in this study may  
5 be because of the level of inadequate knowledge on the route of HBV transmission in  
6 this population (8,15).  
7  
8  
9

10  
11  
12 Prevalence of current HBV infection was lower among those with a positive attitude  
13 towards HBV 19 (45.2). Developing a positive attitude towards a disease is generally  
14 associated with acquiring adequate knowledge on that disease as discussed above  
15 (8,15). This might justify the lower prevalence of current HBV infection among those  
16 with the positive attitude towards HBV.  
17  
18  
19

### ❖ Prevalence of HBV among HCWs

20  
21  
22  
23  
24 Various epidemiological and cross-sectional studies have reported marked variation in  
25 the prevalence of HBsAg among HCWs. Studies carried out among HCWs in Africa gave  
26 1.8 % in Libya (23), 2.9 % in Rwanda (24), 7.0 % in Tanzania (25) and 8.1 % in Uganda  
27 (26). This study revealed a relatively high burden of current HBV infection (10.6%)  
28 among HCWs in Cameroon. The high prevalence of HBV in this study population is  
29 similar to the HBV prevalence obtained in a similar study carried out in Yaoundé (21)  
30 but higher than the 8.7% obtained in the national survey among HCWs (16). The  
31 difference in prevalence of HBV could be because of the different diagnostic techniques  
32 used. The high prevalence of HBV infection obtained among HCWs in Cameroon may be  
33 a reflection of the prevalence of HBV infection in the general Cameroonian population  
34 which is estimated at 11.5% (4) or the lack of adequate knowledge on the route of HBV  
35 transmission among these HCWs (15).  
36  
37  
38  
39  
40  
41  
42  
43  
44  
45  
46

### CONCLUSION

47  
48  
49 The level of knowledge on the route of HBV transmission observed in this study is fair.  
50 This lack of adequate knowledge might justify the relatively high prevalence of HBsAg  
51 positivity, the overall negative attitude towards HBV and the low vaccination rate  
52 among HCWs in this area. Given that knowledge is usually the first step towards  
53 modification of a desirable behaviour, HBV campaigns should be organised to sensitize  
54 HCWs on this disease. This campaign can include improved mass media program such  
55 as broadcasting health talk intermittently online and/or within other television  
56  
57  
58  
59  
60

1  
2  
3 programs. Adequate sensitization will reduce the rate of stigma associated to the  
4 disease and probably the rate of new infections among HCWs.  
5  
6  
7

## 8 **APPENDIX**

9  
10  
11

**Acknowledgement:** All HCWs who consented to participate in this study. Mr Ripa of  
12 CPC for helping out with part of the bench work. RHB for permitting the blood sample to  
13 be stored in the RHB laboratory freezer during sample collection. The students of the  
14 CPC virology laboratory for going through this work.  
15  
16  
17  
18

**Statement of Ethics:** Ethical clearance for the study was obtained from the National  
19 Ethics Committee of Cameroon (N°2017/02/871/CE/CNERSH/SP). Authorization to  
20 carry out research in the NWR was obtained from the regional delegation.  
21 Authorizations to access different hospitals were obtained from the directors or the in-  
22 charge of the hospitals. Authorization to access health centers was obtained from the  
23 District medical officer (DMO) and the chief of centers of the health facilities in this  
24 region. Written informed consent was obtained from each participant.  
25  
26  
27  
28  
29  
30  
31  
32

**Patient and Public Involvement:** Patients and the public were not involved in  
33 designing the questionnaire, collecting and analysing data for this study.  
34  
35  
36  
37  
38  
39

**Authors' contribution:** AE and TC designed the study; AE and FV performed the  
40 experiments; AE drafted the manuscript; TC, NR, AL and KJR were involved in editing  
41 the manuscript; AE performed the statistical analysis. All authors read and approved  
42 the final manuscript.  
43  
44  
45  
46  
47  
48

**Conflict of Interest:** The authors declare no conflict of interest.  
49  
50  
51

## 52 **REFERENCE**

53

- 54 1. Kathleen D. Hepatitis B: causes, symptoms and treatment. Medical News Today.  
55 2018.
- 56 2. WHO. Updated fact sheet: Hepatitis B. In Geneva; 2018.  
57  
58  
59  
60

- 1  
2  
3 3. World Health Organization, Global Hepatitis Programme. Guidelines for the  
4 prevention, care, and treatment of persons with chronic hepatitis B infection  
5 [Internet]. Geneva: WHO; 2015 [cited 2018 Dec 11]. Available from:  
6 [http://apps.who.int/iris/bitstream/10665/154590/1/9789241549059\\_eng.pdf?ua](http://apps.who.int/iris/bitstream/10665/154590/1/9789241549059_eng.pdf?ua=1&ua=1)  
7 [=1&ua=1](http://apps.who.int/iris/bitstream/10665/154590/1/9789241549059_eng.pdf?ua=1&ua=1)  
8  
9
- 10 4. Njouom R, Tejiokem M, Texier G, Fontanet A. O-02: Prevalence of hepatitis B,  
11 hepatitis C and hepatitis D virus infections in Cameroon: results from a national  
12 population based survey (The ANRS 12289 project). *J Viral Hepat* [Internet]. [cited  
13 2018 Dec 11];22(S2):1–2. Available from:  
14 [https://onlinelibrary.wiley.com/doi/abs/10.1111/jvh.01\\_12424](https://onlinelibrary.wiley.com/doi/abs/10.1111/jvh.01_12424)  
15  
16
- 17 5. Tarantola A, Abiteboul D, Rachline A. Infection risks following accidental exposure  
18 to blood or body fluids in health care workers: A review of pathogens transmitted in  
19 published cases. *American Journal of Infection Control*. 2006 Aug;34(6):367–75.  
20
- 21 6. Dement J, Epling C, Ostbye T, Pompeii L, Hunt D. Blood and body fluid exposure risks  
22 among health care workers: results from the Duke Health and Safety Surveillance  
23 System. *American Journal of Industrial Medicine*. 2004 Dec;46(6):637–48.  
24  
25
- 26 7. WHO. Health Care Worker Safety. In Geneva: WHO; 2003.  
27
- 28 8. Reis C, Heisler M, Amowitz L, Moreland S, Mafeni J, Anyamele C, et al. Discriminatory  
29 attitudes and practices by health workers toward patients with HIV/AIDS in Nigeria.  
30 *PLOS Medicine*. 2005 Jul 19;2(8):e246.  
31  
32
- 33 9. Shao E, Mboya I, Gunda D, Ruhangisa F, Temu E, Nkwama M, et al. Seroprevalence of  
34 hepatitis B virus infection and associated factors among healthcare workers in  
35 northern Tanzania. *BMC Infectious Disease*. 2018 Sep 21;18:474.  
36  
37
- 38 10. Abeje G, Azage M. Hepatitis B vaccine knowledge and vaccination status among  
39 health care workers of Bahir Dar City Administration, Northwest Ethiopia: a cross  
40 sectional study. *BMC Infect Dis* [Internet]. 2015 Dec [cited 2019 Jan 8];15(1).  
41 Available from: [http://bmcinfectdis.biomedcentral.com/articles/10.1186/s12879-](http://bmcinfectdis.biomedcentral.com/articles/10.1186/s12879-015-0756-8)  
42 [015-0756-8](http://bmcinfectdis.biomedcentral.com/articles/10.1186/s12879-015-0756-8)  
43
- 44 11. Chinese Military Medical Experts Group in Sierra Leone, Qin Y-L, Li B, Zhou Y-S,  
45 Zhang X, Li L, et al. Prevalence and associated knowledge of hepatitis B infection  
46 among healthcare workers in Freetown, Sierra Leone. *BMC Infect Dis* [Internet].  
47 2018 Dec [cited 2018 Dec 11];18(1). Available from:  
48 <https://bmcinfectdis.biomedcentral.com/articles/10.1186/s12879-018-3235-1>  
49  
50
- 51 12. Ahmed T, Siham A, Asma A, Mawahib E, Zeinab S, Abdelgadir A. Knowledge, Attitude  
52 and Practice of Heath Care Workers Regarding Transmission and Prevention of  
53 Hepatitis B Virus Infection, White Nile State, Sudan, 2013. *Am J Health Res*  
54 [Internet]. 2016 [cited 2019 Jan 8];4(2):18. Available from:  
55 [http://www.sciencepublishinggroup.com/journal/paperinfo?journalid=656&doi=1](http://www.sciencepublishinggroup.com/journal/paperinfo?journalid=656&doi=10.11648/j.ajhr.20160402.11)  
56 [0.11648/j.ajhr.20160402.11](http://www.sciencepublishinggroup.com/journal/paperinfo?journalid=656&doi=10.11648/j.ajhr.20160402.11)  
57  
58
- 59 13. Smith SM. Determining-Sample-Size. *qualtrics*. 2013;7.  
60

14. Tandi TE, Cho Y, Akam AJ-C, Afoh CO, Ryu SH, Choi MS, et al. Cameroon public health sector: shortage and inequalities in geographic distribution of health personnel. *Int J Equity Health* [Internet]. 2015 Dec [cited 2019 Feb 26];14(1). Available from: <http://www.equityhealthj.com/content/14/1/43>
15. ul Haq N, Hassali MA, Shafie AA, Saleem F, Farooqui M, Aljadhey H. A cross sectional assessment of knowledge, attitude and practice towards Hepatitis B among healthy population of Quetta, Pakistan. *BMC Public Health* [Internet]. 2012 Dec [cited 2019 Mar 22];12(1). Available from: <https://bmcpublikealth.biomedcentral.com/articles/10.1186/1471-2458-12-692>
16. Al-Thaqafy MS, Balkhy HH, Memish Z, Makhdom YM, Ibrahim A, Al-Amri A, et al. Improvement of the low knowledge, attitude and practice of hepatitis B virus infection among Saudi national guard personnel after educational intervention. *BMC Res Notes* [Internet]. 2012 [cited 2019 Mar 22];5(1):597. Available from: <http://bmresnotes.biomedcentral.com/articles/10.1186/1756-0500-5-597>
17. Setia S, Gambhir R, Kapoor V, Jindal G, Garg S. Attitudes and Awareness Regarding Hepatitis B and Hepatitis C Amongst Health-care Workers of a Tertiary Hospital in India. *Ann Med Health Sci Res*. 2013;3(4):551–8.
18. Mirowsky J, Ross CE. Education, learned effectiveness and health <sup>1</sup>. *Lond Rev Educ* [Internet]. 2005 Jan [cited 2019 Jan 23];3(3):205–20. Available from: <http://www.ingentaconnect.com/content/ioep/clre/2005/00000003/00000003/art00003>
19. Zimmerma E, Woolf S, Haley A. *Understanding the Relationship Between Education and Health: A Review of the Evidence and an Examination of Community Perspectives*. Agency for Healthcare Research and Quality; 2015.
20. Ngekeng S, Chichom-Mefire A, Nde P, Nsagha D, Nkuigie A, Tiogouo K, et al. Hepatitis B Prevalence, Knowledge and Occupational Factors among Health Care Workers in Fako Division, South West Region Cameroon. *Microbiology Research Journal International*. 2018 Apr 9;23(4):1–9.
21. Tatsilong HOP, Noubiap JJN, Nansseu JRN, Aminde LN, Bigna JJR, Ndze VN, et al. Hepatitis B infection awareness, vaccine perceptions and uptake, and serological profile of a group of health care workers in Yaoundé, Cameroon. *BMC Public Health* [Internet]. 2016 Dec [cited 2018 Dec 11];16(1). Available from: <http://bmcpublikealth.biomedcentral.com/articles/10.1186/s12889-016-3388-z>
22. Abongwa LE, Sunjo NS, Afah NG. Assessment of Knowledge, Attitude and Practice towards Hepatitis B among two rural communities of the Anglophone regions in Cameroon. *IRA-Int J Appl Sci* ISSN 2455-4499 [Internet]. 2016 Oct 3 [cited 2019 Mar 22];4(3):490. Available from: <http://research-advances.org/index.php/IRAJAS/article/view/496>
23. Elzouki A-N, Elgamay SM, Zorgani A, Elahmer O. Hepatitis B and C status among health care workers in the five main hospitals in eastern Libya. *J Infect Public Health*

- 1  
2  
3 [Internet]. 2014 Nov [cited 2019 Jan 12];7(6):534–41. Available from:  
4 <https://linkinghub.elsevier.com/retrieve/pii/S1876034114001063>  
5  
6  
7 24. Kateera F, Walker T, Mutesa L, Mutabazi V, Musabeyesu E, Mukabatsinda C, et al.  
8 Hepatitis B and C seroprevalence among health care workers in a tertiary hospital in  
9 Rwanda. *RTransactions of the Royal Society of Tropical Medicine and Hygiene*. 2015  
10 Jan 30;109:203–208.  
11  
12 25. Mueller A, Stoetter L, Kalluvya S, Stich A, Majinge C, Weissbrich B, et al. Prevalence  
13 of hepatitis B virus infection among health care workers in a tertiary hospital in  
14 Tanzania. *BMC Infect Dis [Internet]*. 2015 [cited 2018 Dec 11];15(1). Available from:  
15 <http://bmcinfectdis.biomedcentral.com/articles/10.1186/s12879-015-1129-z>  
16  
17 26. Ziraba A, Bwogi J, Namale A, Wainaina C, Mayanja-Kizza H. Sero-prevalence and risk  
18 factors for hepatitis B virus infection among health care workers in a tertiary  
19 hospital in Uganda. *BMC Infectious Disease*. 2010 Jun 29;10:191.  
20  
21 27. Ndongo CB, Eteki L, Siedner M, Mbaye R, Chen J, Ntone R, et al. Prevalence and  
22 vaccination coverage of Hepatitis B among healthcare workers in Cameroon: A  
23 national seroprevalence survey. *J Viral Hepat [Internet]*. 2018 Dec 1 [cited 2018 Dec  
24 11];25(12):1582–7. Available from:  
25 <https://onlinelibrary.wiley.com/doi/abs/10.1111/jvh.12974>  
26  
27  
28  
29  
30  
31  
32  
33  
34  
35  
36  
37  
38  
39  
40  
41  
42  
43  
44  
45  
46  
47  
48  
49  
50  
51  
52  
53  
54  
55  
56  
57  
58  
59  
60



**Table I. Baseline characteristics in the studied population**

| Variables                  |                      | Frequency (398) | Percentage |
|----------------------------|----------------------|-----------------|------------|
| Sex                        | Male                 | 126             | 31.7       |
|                            | Female               | 272             | 68.3       |
| Age Intervals              | 16-25                | 167             | 42.0       |
|                            | 26-35                | 157             | 39.4       |
|                            | 36-45                | 50              | 12.6       |
|                            | 46-65                | 24              | 6.0        |
| Level of Education         | Secondary and below  | 39              | 8.8        |
|                            | Diploma              | 59              | 14.8       |
|                            | SRN/SRM              | 55              | 13.8       |
|                            | HND                  | 103             | 25.9       |
|                            | BSc                  | 118             | 29.6       |
|                            | Post Graduate        | 24              | 6.0        |
| Duration In the Occupation | ≤ 1 year             | 72              | 18.1       |
|                            | 2 – 4 years          | 218             | 54.8       |
|                            | 5 – 9 years          | 55              | 13.8       |
|                            | ≥ 10 year            | 53              | 13.3       |
| HCWs category              | Nurses               | 224             | 56.6       |
|                            | Lab Technicians      | 90              | 11.6       |
|                            | Medical Doctors      | 17              | 4.8        |
|                            | Dentist/Pharmacist   | 23              | 9.2        |
|                            | Sanitary Workers     | 44              | 17.6       |
|                            | Biomedical Student   | 149             | 37.4       |
| Role In the Hospital       | Biomedical Personnel | 249             | 62.6       |
|                            |                      |                 |            |
| Residence                  | Urban                | 335             | 84.2       |
|                            | Semi-Urban           | 18              | 4.5        |
|                            | Rural                | 45              | 11.3       |

Data are n and %.

**Table II. Knowledge on route of HBV transmission**

| Questions            | Correct Response n (%) |                        |                        |                           |                         |               |            |
|----------------------|------------------------|------------------------|------------------------|---------------------------|-------------------------|---------------|------------|
|                      | Nurses (n=224)         | Medical Doctors (n=17) | Lab Technicians (n=90) | Dentist/Pharmacist (n=23) | Sanitary Workers (n=44) | Total (n=398) |            |
| Heard of HBV         | Yes                    | 199 (88.8)             | 16 (94.1)              | 86 (95.6)                 | 17 (73.9)               | 20 (45.5)     | 338 (84.9) |
|                      | No                     | 25 (11.2)              | 1 (5.9)                | 4 (4.4)                   | 6 (26.1)                | 24 (54.5)     | 60 (15.1)  |
| Sexually transmitted | Yes                    | 183 (81.7)             | 16 (94.1)              | 82 (91.1)                 | 14 (60.9)               | 18 (40.9)     | 313 (78.6) |
|                      | No                     | 41 (18.3)              | 1 (5.9)                | 8 (8.9)                   | 9 (39.1)                | 26 (59.1)     | 85 (21.4)  |

|                             |     |            |           |           |           |           |            |
|-----------------------------|-----|------------|-----------|-----------|-----------|-----------|------------|
| Transmitted through kissing | Yes | 176 (78.6) | 12 (70.6) | 78 (86.7) | 14 (60.9) | 19 (43.2) | 299 (75.1) |
|                             | No  | 48 (21.4)  | 5 (29.4)  | 12 (13.3) | 9 (39.1)  | 25 (56.8) | 99 (24.9)  |
| Vertical transmission       | Yes | 179 (79.9) | 14 (82.4) | 69 (76.7) | 14 (60.9) | 16 (36.4) | 292 (73.4) |
|                             | No  | 45 (20.0)  | 3 (17.6)  | 21 (23.3) | 9 (39.1)  | 28 (63.6) | 106 (26.6) |
| Contact with body fluids    | Yes | 191 (85.3) | 15 (88.2) | 84 (93.3) | 16 (69.6) | 18 (40.9) | 324 (81.4) |
|                             | No  | 33 (14.7)  | 2 (11.8)  | 6 (6.7)   | 7 (30.4)  | 26 (59.1) | 74 (18.6)  |
| Knowledge on HBV            | Yes | 149 (66.5) | 11 (64.7) | 63 (70.0) | 12 (52.2) | 13 (29.6) | 248 (62.3) |
|                             | No  | 75 (33.5)  | 6 (35.3)  | 27 (30.0) | 11 (47.8) | 31 (70.5) | 150 (37.7) |

Data are n(%).

**Table III. Attitude of HCWs towards HBV**

| Attitudes                         |          | Health Care Worker n (%) |               |                     |                                  |                                |                  |
|-----------------------------------|----------|--------------------------|---------------|---------------------|----------------------------------|--------------------------------|------------------|
|                                   |          | Nurses<br>(n=224)        | MDs<br>(n=17) | Lab Techs<br>(n=90) | Dentist/<br>Pharmacist<br>(n=23) | Auxillary<br>workers<br>(n=44) | Total<br>(n=398) |
| Attitude towards infected persons | Good     | 137 (61.2)               | 13 (76.5)     | 70 (77.8)           | 18 (78.3)                        | 32 (72.7)                      | 270 (67.8)       |
|                                   | Bad      | 87 (38.8)                | 4 (23.5)      | 20 (22.2)           | 5 (21.7)                         | 12 (27.3)                      | 128 (32.2)       |
| Practice safe hygiene             | Yes      | 193 (86.2)               | 14 (82.4)     | 63 (70.0)           | 20 (87.0)                        | 27 (61.4)                      | 317 (79.6)       |
|                                   | No       | 31 (13.8)                | 3 (17.6)      | 27 (30.0)           | 3 (13.0)                         | 17 (38.6)                      | 81 (20.4)        |
| Wears gloves often                | Yes      | 177 (79.0)               | 15 (88.2)     | 82 (91.1)           | 14 (60.9)                        | 22 (50.0)                      | 310 (77.9)       |
|                                   | No       | 47 (21.0)                | 2 (11.8)      | 8 (8.9)             | 9 (39.1)                         | 22 (50.0)                      | 88 (22.1)        |
| Frequency of needle stick injury  | Often    | 10 (4.5)                 | 0 (0.0)       | 1 (1.1)             | 0 (0.0)                          | 3 (6.8)                        | 14 (3.5)         |
|                                   | Rarely   | 214 (95.5)               | 17 (100.0)    | 89 (98.9)           | 23 (100.0)                       | 41 (93.2)                      | 384 (94.5)       |
| Received 1 dose of vaccine        | Yes      | 43 (19.2)                | 4 (23.5)      | 28 (31.1)           | 13 (56.5)                        | 5 (11.4)                       | 93 (23.4)        |
|                                   | No       | 181 (80.8)               | 13 (76.5)     | 62 (68.9)           | 10 (43.5)                        | 39 (88.6)                      | 305 (76.6)       |
| Sexually promiscuous              | Yes      | 46 (20.5)                | 4 (23.5)      | 10 (11.1)           | 8 (34.8)                         | 16 (36.4)                      | 84 (21.1)        |
|                                   | No       | 178 (79.5)               | 13 (76.5)     | 80 (88.9)           | 15 (65.2)                        | 28 (63.6)                      | 314 (78.9)       |
| General Attitude                  | Positive | 87 (38.8)                | 9 (52.9)      | 54 (60.0)           | 11 (47.8)                        | 13 (31.8)                      | 175 (44.0)       |
|                                   | Negative | 137 (61.2)               | 8 (47.1)      | 36 (40.0)           | 12 (52.2)                        | 30 (68.2)                      | 223 (56.0)       |

Data are n(%).

**Table IV. Prevalence of HBV infection among HCWs**

| Characteristic             |                      | Knowledge on route of transmission |                   | Positive attitude |              | HBsAg Positivity |         |       |           |       |
|----------------------------|----------------------|------------------------------------|-------------------|-------------------|--------------|------------------|---------|-------|-----------|-------|
|                            |                      | n(%)                               | p-value           | n(%)              | p-value      | n(%)             | p-value |       |           |       |
| Sex                        | Male                 | 84 (66.7)                          | 0.222             | 61 (48.4)         | 0.224        | 9 (7.1)          | 0.132   |       |           |       |
|                            | Female               | 164 (60.3)                         |                   | 114 (41.9)        |              | 33 (12.1)        |         |       |           |       |
| Age Group                  | 16-25                | 111 (66.5)                         | <b>0.043</b>      | 74 (44.3)         | 0.333        | 14 (8.4)         | 0.522   |       |           |       |
|                            | 26-35                | 101 (64.7)                         |                   | 72 (49.9)         |              | 19 (12.2)        |         |       |           |       |
|                            | 36-45                | 25 (49.0)                          |                   | 17 (34.0)         |              | 5 (9.8)          |         |       |           |       |
|                            | 46-65                | 11 (45.8)                          |                   | 12 (50.0)         |              | 4 (16.7)         |         |       |           |       |
| Level of education         | ≤ Secondary          | 10 (25.6)                          | <b>&lt; 0.001</b> | 14 (35.9)         | 0.186        | 3 (7.7)          | 0.819   |       |           |       |
|                            | Diploma              | 32 (54.2)                          |                   | 23 (39.0)         |              | 6 (10.2)         |         |       |           |       |
|                            | SRN/SRM              | 32 (58.2)                          |                   | 22 (30.0)         |              | 9 (16.4)         |         |       |           |       |
|                            | HND                  | 76 (73.8)                          |                   | 42 (40.8)         |              | 10 (9.7)         |         |       |           |       |
|                            | BSc                  | 81 (68.6)                          |                   | 64 (54.2)         |              | 12 (10.2)        |         |       |           |       |
|                            | Post Graduate        | 17 (70.8)                          |                   | 10 (41.2)         |              | 2 (8.3)          |         |       |           |       |
| Duration in the occupation | ≤ 1 year             | 44 (61.1)                          | 0.209             | 30 (41.7)         | 0.705        | 7 (9.7)          | 0.941   |       |           |       |
|                            | 2-4 years            | 145 (66.5)                         |                   | 101 (46.3)        |              | 23 (10.6)        |         |       |           |       |
|                            | 5-9 years            | 31 (56.4)                          |                   | 21 (38.2)         |              | 7 (12.7)         |         |       |           |       |
|                            | ≥ 10 year            | 28 (52.8)                          |                   | 23 (43.4)         |              | 5 (9.4)          |         |       |           |       |
| HCWs category              | Nurses               | 149 (66.5)                         | <b>&lt;0.001</b>  | 87 (38.8)         | <b>0.004</b> | 28 (12.5)        | 0.495   |       |           |       |
|                            | Lab Tech             | 63 (70)                            |                   | 54 (60.0)         |              | 8 (8.9)          |         |       |           |       |
|                            | Medical doctors      | 11 (64.7)                          |                   | 9 (52.9)          |              | 1 (5.9)          |         |       |           |       |
|                            | Dentist/Pharmacist   | 12 (52.2)                          |                   | 11 (47.8)         |              | 3 (13.0)         |         |       |           |       |
|                            | Sanitary workers     | 13 (29.5)                          |                   | 13 (31.8)         |              | 2 (4.5)          |         |       |           |       |
|                            | Biomedical students  | 97 (65.1)                          |                   | 0.374             |              | 65 (43.6)        |         | 0.914 | 13 (8.7)  | 0.359 |
|                            | Biomedical personnel | 151 (60.6)                         |                   |                   |              | 110 (44.2)       |         |       | 29 (11.6) |       |
| Residence                  | Urban                | 212 (63.3)                         | 0.275             | 152 (45.4)        | 0.408        | 38 (11.3)        | 0.492   |       |           |       |
|                            | Semi-urban           | 8 (44.4)                           |                   | 6 (33.3)          |              | 1 (5.5)          |         |       |           |       |
|                            | Rural                | 28 (62.2)                          |                   | 17 (37.8)         |              | 3 (6.7)          |         |       |           |       |

Data are n(%); p-value<0.05 is considered significant.

**Table V: Association between knowledge, attitude and prevalence of HBsAg**

| Characteristics  |          | Reactivity to HBsAg |      |         | Unadjusted Risk of HBsAg |               |
|------------------|----------|---------------------|------|---------|--------------------------|---------------|
|                  |          | No                  | %    | p-value | OR                       | 95% CI        |
| Knowledge (n=42) | Adequate | 25                  | 59.5 | 0.694   | 1.140                    | 0.594 - 2.189 |
|                  | Poor     | 17                  | 40.5 |         |                          |               |
| Attitude (n=270) | Positive | 19                  | 45.2 | 0.861   | 0.994                    | 0.497 - 1.795 |
|                  | Negative | 23                  | 54.8 |         |                          |               |

p-value<0.05 is considered to be significant.

# BMJ Open

## KNOWLEDGE, ATTITUDE AND PREVALENCE OF HEPATITIS B VIRUS AMONG HEALTH CARE WORKERS: A CROSS-SECTIONAL HOSPITAL-BASED STUDY, BAMENDA HEALTH DISTRICT, NWR, CAMEROON.

|                                 |                                                                                                                                                                                                                                                                                                                                                                                                                                                                                       |
|---------------------------------|---------------------------------------------------------------------------------------------------------------------------------------------------------------------------------------------------------------------------------------------------------------------------------------------------------------------------------------------------------------------------------------------------------------------------------------------------------------------------------------|
| Journal:                        | <i>BMJ Open</i>                                                                                                                                                                                                                                                                                                                                                                                                                                                                       |
| Manuscript ID                   | bmjopen-2019-031075.R1                                                                                                                                                                                                                                                                                                                                                                                                                                                                |
| Article Type:                   | Research                                                                                                                                                                                                                                                                                                                                                                                                                                                                              |
| Date Submitted by the Author:   | 17-Sep-2019                                                                                                                                                                                                                                                                                                                                                                                                                                                                           |
| Complete List of Authors:       | Akazong, Etheline; University of Dschang Faculty of Sciences, Department of Biochemistry<br>Tume, Christopher; University of Dschang Faculty of Sciences, Department of Biochemistry; University of Bamenda, Department of Biochemistry<br>Njouom, Richard; Centre Pasteur Cameroun<br>Ayong, Lawrence; Centre Pasteur Cameroun<br>Fondoh, Victor; Regional Hospital Bamenda Laboratory<br>Kuiate, Jules-Roger; University of Dschang Faculty of Sciences, Department of Biochemistry |
| <b>Primary Subject Heading</b>: | Public health                                                                                                                                                                                                                                                                                                                                                                                                                                                                         |
| Secondary Subject Heading:      | Epidemiology                                                                                                                                                                                                                                                                                                                                                                                                                                                                          |
| Keywords:                       | Health care workers, HBV, HBsAg, Attitude, Knowledge, Cameroon                                                                                                                                                                                                                                                                                                                                                                                                                        |
|                                 |                                                                                                                                                                                                                                                                                                                                                                                                                                                                                       |

SCHOLARONE™  
Manuscripts

1  
2  
3 **KNOWLEDGE, ATTITUDE AND PREVALENCE OF HEPATITIS B VIRUS AMONG**  
4 **HEALTH CARE WORKERS: A CROSS-SECTIONAL HOSPITAL-BASED STUDY,**  
5 **BAMENDA HEALTH DISTRICT, NWR, CAMEROON.**  
6  
7  
8  
9

10 Akazong Etheline<sup>1</sup>, Tume Christopher<sup>1,3</sup>, Njouom Richard<sup>2</sup>, Ayong Lawrence<sup>2</sup>, Fondoh  
11 Victor<sup>4</sup>, Kuate Jules-Roger<sup>1\*</sup>.

12  
13  
14 <sup>1</sup> Department of Biochemistry, University of Dschang, Cameroon

15 <sup>2</sup> Centre Pasteur of Cameroon, Yaoundé, Cameroon

16  
17 <sup>3</sup> Department of Biochemistry, University of Bamenda, Cameroon

18  
19 <sup>4</sup> Regional Hospital Bamenda Laboratory, Cameroon  
20  
21

22  
23 Short title: Akazong *et al.*; 2018.  
24  
25

26 \*Corresponding Author

27 Kuate Jules-Roger

28 Department of Biochemistry

29 University of Dschang

30 BP 67, Dschang, Cameroon

31 Fax: +237 234 691 506

32  
33  
34  
35  
36  
37  
38  
39  
40  
41  
42  
43  
44  
45  
46  
47  
48  
49  
50  
51  
52  
53  
54  
55  
56  
57  
58  
59  
60  
60  
Tel: +237 699 679 135

Email: [jules.kuate@univ-dschang.org](mailto:jules.kuate@univ-dschang.org)

## ABSTRACT

**Introduction:** The Hepatitis B Virus (HBV) is a blood borne virus which can be transmitted via percutaneous and mucocutaneous exposure to infected body fluid. Health care workers (HCWs) who continuously are exposed to different body fluids are at an increased risk of contracting and transmitting this virus. It is thus important to evaluate the knowledge and attitude of HCWs towards HBV, and the prevalence of HBV infection among them.

**Method:** This cross-sectional study was carried out between April and September, 2017. Overall, 398 HCWs were recruited for this study. Knowledge on the route of HBV transmission and attitude towards HBV was evaluated using a well-structured questionnaire. Hepatitis B surface antigen (HBsAg) positivity was obtained using the Monolisa HBsAg ULTRA kit (Bio-Rad). Data was analyzed using the Statistical Package for the Social Sciences version 20 (SPSS v. 20).

**Results:** Among the HCWs who participated in this study, 338 (84.9%) HCWs had heard of HBV, 269 (67.6%) of them had adequate knowledge on the route of HBV transmission. Medical doctors were the most knowledgeable among biomedical workers and students (76.5%). Stigma rate was highest among nurses 87 (38.8%). Prevalence of HBsAg positivity was high 42 (10.6%) given that there is an efficient and available vaccine.

**Conclusion:** Knowledge on the route of HBV transmission was fair, the level of stigmatization of HBV infected patients and the prevalence of HBV infection was high in this study. A sensitization campaign should be carried out to educate HCWs on HBV, thus reducing the level of stigma associated with HBV as well as the probability of contacting HBV as a nosocomial infection.

**Key words:** Health care workers, HBV, HBsAg, Attitude, Knowledge, Vaccination, Cameroon.

**Abbreviations:** HBV: Hepatitis B virus, MD: Medical doctor, Lab tech: Laboratory technician, HCWs: Health care workers, SRN/SRM: State Registered Nurse/Midwife, NWR: North West Region, KAP: Knowledge, attitude and practice/prevalence, HND: Higher National Diploma, BSc: Bachelor of Science, HBsAg: Hepatitis B surface antigen, ELISA: Enzyme-linked immunosorbent assay, CMA: Centre medical d'arrondissement (district medical centers), MOE: Margin of error.

**Strength:**

- Monalisa™ HBsAg ULTRA ELISA kit with 100% sensitivity and specificity of 99.28% was used to determine current HBV infection (HBsAg positivity).
- Questionnaires were answered in the presence of the researcher to prevent participants from discussing answers or getting answers online.
- Stratified sampling technique, which permits estimation of population parameters for groups within population was used for sampling.

**Limitation:**

- Information on knowledge and attitude were self-reported, and chances of individual bias cannot be completely overruled.
- The present study covers a cross-section of health professionals, so caution should be taken while generalizing the results.

## INTRODUCTION

The hepatitis B virus (HBV) is an enveloped virus of the hepadnavirus family that infects the liver, causing hepatocellular necrosis and inflammation. HBV, spread by percutaneous or mucosal exposure to infected blood and various body fluids can either cause an acute or chronic disease (1). An estimated 257 million people are living with HBV (2), and about 20% to 30% of those who become chronically infected will develop complications. Currently available treatments fail to eradicate the virus in most of those treated, necessitating potentially lifelong treatment (3) and approximately 650,000 people die annually due to chronic hepatitis B (CHB) (3). Cameroon, a sub-Saharan African country, is considered hyper-endemic with a prevalence rate of HBV infection estimated at 11.5% (4).

Health care workers (HCW) who are frequently in contact with blood and other body fluids in the course of their work are at higher risk of exposure to blood borne viral diseases such as HBV, Hepatitis C Virus (HCV) and Human immunodeficiency virus (HIV) (5–7). Among the HCWs worldwide, about 2 million HCWs are exposed and about 70,000 are infected with HBV annually (7). The World Health Organization (WHO) global burden of the disease showed that 37% of HBV among HCWs was the result of occupational exposure resulting from sharps injuries to HCWs (2). More than 90% of these infections occur in developing countries (7). The risk of occupational infections in developing countries is intensified by a variety of factors, comprising but not restricted to, overcrowding in hospitals, lower HCW:patient ratio, insufficient or absence of basic safety and protection equipment, reutilizing/reprocessing contaminated needles and sharp instruments and partial awareness of exposure-risk to blood and body fluid (5).

Although needle stick injury hepatitis sero-conversion is somewhat rare, the costs of treatment and anxiety about the possible consequences of an exposure are serious. This might be why some HCWs refuse to service patients with blood borne viral diseases such as HBV. Prevention through immunization and increasing knowledge thus stand out as the safest strategy against the high prevalence of viral hepatitis among HCWs. Knowing facts and having proper awareness, can influence the attitudes of HCWs and control the menace of the disease (8). A number of studies in Africa have evaluated the level of the knowledge, attitude, and practice of HCWs toward HBV and the vaccination



1  
2  
3 status of HCWs (9–12). The low level of vaccination and the high prevalence of HBsAg  
4 recorded in different studies might be justified by the low level of knowledge on the  
5 route of transmission among HCWs (13–16).  
6  
7  
8  
9

10 Prevention is still a recommended safeguard against an epidemic of viral hepatitis.  
11 Knowledge and attitudes of the clinician play a key role in prevention and spread of  
12 infection. By knowing facts, having proper awareness, and attitudes, the menace of this  
13 disease can be prevented to a great extent. Therefore, the objectives of the present  
14 study are to assess the knowledge and attitudes of HCWs regarding HBV, and to  
15 compare their knowledge and attitude score to the prevalence of HBV infection.  
16  
17  
18  
19  
20  
21

## 22 **MATERIALS AND METHODS**

### 23 **Study design and setting**

24 This cross-sectional hospital-based study was conducted among HCWs in the Bamenda  
25 health district, North West Region (NWR) of Cameroon. Samples were collected  
26 between April and September 2017, and included 22 health facilities in this health  
27 district (among which were 1 regional hospital, 3 CMAs, 6 mission hospitals, 5  
28 government health centers and 7 private hospitals). Over 70% of HCWs in the various  
29 health facilities were recruited for this study. Testing stations were set up in the various  
30 wards in the health facilities.  
31  
32  
33  
34  
35  
36  
37  
38  
39

### 40 **Ethical consideration**

41 Ethical clearance for the study was obtained from the National Ethics Committee of  
42 Cameroon (N°2017/02/871/CE/CNERSH/SP). Authorization to carry out research in  
43 the NWR was obtained from the regional delegation. Authorizations to access different  
44 hospitals were obtained from the directors or the in-charge of the hospitals.  
45 Authorization to access health centers was obtained from the District medical officer  
46 and the chief of centers of the health facilities. Written informed consent was obtained  
47 from each participant.  
48  
49  
50  
51  
52  
53  
54  
55

### 56 **Study participants**

57 HCWs present in the selected hospitals during the study period were informed and  
58 invited to participate in the study. HCWs in the study comprised of medical doctors,  
59  
60

nurses, dentists, pharmacists, laboratory technicians, sanitary workers and biomedical students working in the Bamenda health district during the study period.

### **Sample Size and Justification**

Sample size was determined using the Population Proportion Sample Size formula proposed by Scott Smith (13),  $X = Z\text{-score} * SD * (1 - SD) / MOE$ . The proportion of HCWs in the North-West Region was obtained from a registry published in 2015 (14) which published the national proportions of HCWs per region. The confidence level was 95% giving a Z-Score of 1.96, a margin of error (MOE) of +/- 5 and a standard deviation (SD) of 0.5. Using this formula, the calculated sample size was 385 persons.

### **Sample collection**

Participants who consented to the study completed a structured questionnaire which was used to collect data on sociodemographic characteristics, HBV exposure risks, HBV vaccination and attitude towards HBV. Stratified sampling technique, which permits estimation of population parameters for groups within population was used for sampling. The questionnaire was self-administered and contained both closed and open-ended questions to assess the perspectives of the respondents towards HBV. Participants who could read and write completed the form by themselves while those who could neither read nor write were assisted. The questionnaire was filled in the presence of the researcher to prevent participants from discussing answers or getting answers online. Pre-designed and pre-tested, semi-structured questionnaire items with response options was developed based on KAP surveys with similar objectives (15–17). Serum was obtained from 4ml of blood collected from study participants into a red cap (dry) tube. Identification number was used to link participant's laboratory results and the questionnaire.

### **Definition for scoring knowledge**

Knowledge on the route of HBV transmission was assessed using 3 questions directly linked with the route of HBV infection. Adequate knowledge was when a correct answer was given to all three questions. This minimum of 3/3 defining a good level of knowledge may seem rigorous. However, this minimum level justified the affordable difficulty of the questions.

### Definition for scoring attitude

Attitude was assessed using 6 criteria: attitude towards HBV infected persons, quality of hygiene (how often HCWs wash and/or disinfect their hands), frequency of glove use, frequency of needle stick injury, sexuality, and vaccination status of the HCW. Attitude was considered positive when a participant was able to correctly give at least 5 of the 6 expected answers. Having 5 of the 6 responses correct is deemed as having a positive attitude because HCWs are at the forefront of healthcare provision and should have appropriate attitude towards HBV for others in the population to emulate.

### HBV serology

HBsAg was tested using the MONOLISA HBsAg ULTRA ELISA kit from Bio-Rad (Marnes-La-Coquette-France), a fully multivalent assay showing high sensitivity in the detection of HBV mutants to determine those who were positive for HBsAg (6). ELISA assay was performed following the manufacturer's instructions.

### Statistical analysis

Data was analyzed using SPSS version 20.0 for Windows (SPSS, Chicago, Illinois, USA). Descriptive statistics for demographic characteristics, percentages for categorical variables, median and interquartile range (IQR) for continuous variables were used to analyse the findings of the study. Pearson's Chi square ( $p < 0.05$ ) was used to assess the significance among study variables.

**Patient and Public Involvement Statement:** Patients and the public were not involved in designing the questionnaire, collecting and analysing data for this study.

## RESULTS

### Socio-demographic characteristics of study participants

In each health facility in the Bamenda Health District, over 70% of HCWs consented to participate in this study. Overall, a total of 398 HCWs across the Bamenda Health District participated in this study. Among these, 272 (68.3%) were women; the (16-25) year old age group was the most represented 167 (42.0%), and median age was 27.0 years (IQR, 23 - 32 years) at 95%CI (Table 1). Most participants were nurses (56.6% of

workers and 55.7% of students), had worked for 2-4 years and lived in an urban setting (84.2%).

### **Assessment of Knowledge**

A total of 3 questions were used to assess knowledge of HCWs from different hospitals in this region on the route of HBV transmission (Table 2). 338 (84.9%) participants had heard of HBV. Most participants correctly identified sexual intercourse 313 (78.6%), mother-to-child transmission 292 (73.4 %) and contact with body fluid 324 (81.4 %) as routes of contamination with HBV. Among these, medical doctors were the most knowledgeable regarding HBV 13 (76.5%) while not up to 50% of sanitary workers had heard of HBV before this study (Table 3). Knowledge was significantly associated to the level of education and HCWs category ( $P<.001$ ). Overall, these HCWs had an unsatisfactory level of knowledge on the route of HBV transmission 269 (67.6%). Knowledge on the route of HBV transmission was higher among biomedical students 104 (69.8%) compared to the personnels 165 (66.3%). Prevalence of HBsAg positivity was higher among those with adequate knowledge on the route of HBV transmission 26 (61.9%) (Table 4).

### **Attitude of HCWS TO HBV**

Among the 398 HCWs, 270 (67.8%) HCWs had a positive attitude towards HBV infected persons (Table 5). Majority of HCWs practiced safe hygiene (washed their hands often and/or used a disinfectant) 317 (79.6%) and wore gloves often 310 (77.9%) while administering treatment. Needle stick injury was highest among sanitary workers (3 (6.8%) while promiscuity (defined as having more than 10 sex partners in your life time, having sex with prostitute(s), and/or one night stands was highest among dentist 6(40.0). Only 93(23.4%) of HCWs reported receiving at least one dose of the vaccine, while 175 (44.0) HCWs showed an overall positive attitude towards HBV (Table 5). There was a significant correlation between HCWs category and attitude towards HBV ( $P=.003$ ) (Table 3). Prevalence of current HBV infection (HBsAg positivity) was lower among those with a positive attitude towards HBV 19 (45.2) (Table 4).

### **Prevalence of HBsAg among HCWs**

1  
2  
3 The prevalence of HBsAg positivity was 10.6% (Table 3). No statistically significant  
4 association was observed between HBsAg positivity and the different classes involved  
5 in this study (Table 3). Majority of those infected belonged to the (46-65) year age  
6 group 4 (16.7%), had worked for (5-9) years 7 (12.7%), had an SRN/SRM certificate 9  
7 (16.4), were nurses 28 (12.5) and lived in an urban setting 38 (11.3). No significant  
8 association was observed between knowledge on the route of HBV infection, attitude  
9 towards HBV and being positive for HBsAg (Table 4).  
10  
11  
12  
13  
14  
15  
16

## 17 **DISCUSSION**

18  
19 Exposure to blood-borne pathogens such as HBV infection remains a significant  
20 occupational hazard to HCWs, especially in countries where the prevalence of this  
21 infection is high. KAP studies among HCWs are necessary to evaluate and improve the  
22 awareness on the route of transmission, prevention and management of infectious  
23 diseases. This study was carried out to assess the knowledge, attitude and prevalence of  
24 HBV among HCWs in the Bamenda Health District, NWR, Cameroon.  
25  
26  
27  
28  
29  
30

### 31 ❖ **Assessment of Knowledge**

32  
33 HCWs are at the fore front of health care provision and it is expected that they should  
34 know the routes of transmission of different infectious agents in order to protect their  
35 patients and themselves from nosocomial infections. Results of the current study  
36 revealed a significant association between HCWs category, level of education and  
37 knowledge on the route of HBV transmission. This is similar to what was obtained in  
38 Sierra Leone (11), Sudan (18) and Northeast Ethopia (19). This may be justified by the  
39 fact that education trains individuals to acquire, evaluate and use information (20). This  
40 may justify the unequal access to and exploitation of educational resources which  
41 increases with level of education (21) as well as role in the health setting.  
42  
43  
44  
45  
46  
47  
48  
49

50  
51 Even though majority of HCWs in this setting had heard of HBV infection prior to this  
52 study 338 (84.9%), only 269 (67.6%) of them had good knowledge on the route of HBV  
53 transmission. This is similar to the 62.5% obtained in Northern Tanzania (9) and the  
54 58.7% obtained in the South West Region of Cameroon (22). However, this is higher  
55 than the 47.0% obtained in Yaoundé among HCWs (23), 52% obtained in North West,  
56 Ethiopia (10), the 29.9% obtained in Sierra Leone (11) and the 42.1% obtained in a  
57  
58  
59  
60

1  
2  
3 rural population in the North West Region of Cameroon (24). According to Abongwa *et*  
4 *al.* (2016), the most probable reason for the low level of adequate knowledge on the  
5 route of HBV transmission could be inadequate health educative programs forcing the  
6 population to get information on HBV from friends and/or relatives (24). Getting  
7 information from friend, relatives and/or colleagues increases the probability of getting  
8 inappropriate information.  
9  
10  
11  
12  
13

14  
15 The level of current HBV infection was higher among those who had an adequate  
16 knowledge on the route of HBV transmission 26 (61.9%). This is contrary to what is  
17 anticipated (15) given that better knowledge on the route of disease transmission  
18 should help the individual take precautions against getting the infection in question.  
19 The disparity observed in this study can be explained by the same principle underlined  
20 above; inadequate health educative programs forcing the population to get information  
21 on HBV from friends, relatives and/or colleagues (22). This can thus justify the fact that  
22 most of the infected HCWs were chronic carriers who after their first diagnosis or  
23 exposure to HBV were directed to gastroenterologist for follow-up.  
24  
25  
26  
27  
28  
29  
30  
31  
32

#### 33 ❖ Assessment of Attitude of HCWs to HBV

34  
35 There was a significant association between HCWs category and attitude towards HBV  
36 ( $P=.003$ ) and even though 270 (67.8%) HCWs had a positive attitude (behaviour)  
37 towards HBV infected persons, only 175 (44.0%) HCWs showed an overall positive  
38 attitude towards HBV. The poor attitude of the majority of HCWs towards HBV in this  
39 study may be justified by the level of inadequate knowledge on the route of HBV  
40 transmission in this population (8,15).  
41  
42  
43  
44  
45  
46

47 Prevalence of current HBV infection was lower among those with a positive attitude  
48 towards HBV 19 (45.2%). Developing a positive attitude towards a disease is generally  
49 associated with acquiring adequate knowledge on that disease as discussed above  
50 (8,15). This might justify the lower prevalence of current HBV infection among those  
51 with the positive attitude towards HBV.  
52  
53  
54  
55  
56

#### 57 ❖ Prevalence of HBV among HCWs

1  
2  
3 Various epidemiological and cross-sectional studies have reported marked variation in  
4 the prevalence of HBsAg among HCWs. Studies carried out among HCWs in Africa gave  
5 1.8 % in Libya (25), 2.9 % in Rwanda (26), 7.0 % in Tanzania (27) and 8.1 % in Uganda  
6 (28). This study revealed a relatively high burden of current HBV infection (10.6%)  
7 among HCWs in Cameroon. The high prevalence of HBV in this study population is  
8 similar to the HBV prevalence obtained in a similar study carried out in Yaoundé (23)  
9 but higher than the 8.7% obtained in the national survey among HCWs (29). The  
10 difference in prevalence of HBV could be because of the different diagnostic techniques  
11 used. The high prevalence of HBV infection obtained among HCWs in Cameroon may be  
12 a reflection of the prevalence of HBV infection in the general Cameroonian population  
13 which is estimated at 11.5% (4) or the lack of adequate knowledge on the route of HBV  
14 transmission among these HCWs (15).  
15  
16  
17  
18  
19  
20  
21  
22  
23  
24  
25

26 The prevalence of HBV positivity was low in the (16-25) years age group and could be  
27 justified by the expanded immunization between 1990 to 2005, which led to a decrease  
28 in HBV infections in most regions particularly Central sub-Saharan Africa (30).  
29 Furthermore, most students were in the (16-25) year age group and thus had just  
30 started working in the health facilities.  
31  
32  
33  
34  
35

36 This was a cross-sectional study implying that participants were met only once. There  
37 was no follow-up to determine the outcome of the infection. Besides, data on knowledge  
38 and attitude were self-reported in this study and could be subject to individual bias.  
39 Finally, no serological test was performed to evaluate the level of vaccination coverage  
40 in this at-risk population. This implies that, the number of HCWs immune against HBV is  
41 lower than what is reported in this study. This negative attitude of HCWs, can be justify  
42 by the high cost of the vaccine, the lack of adequate supply and/or the simple fear of  
43 receiving the vaccine provoked by the many myths surrounding vaccination in some  
44 settings (31).  
45  
46  
47  
48  
49  
50  
51  
52  
53

## 54 **CONCLUSION**

55 The level of knowledge on the route of HBV transmission observed in this study is fair.  
56 This lack of adequate knowledge might justify the relatively high prevalence of HBsAg  
57 positivity, the overall negative attitude towards HBV and the low rate of vaccination  
58  
59  
60

1  
2  
3 among HCWs in this area. Given that knowledge is usually the first step towards  
4 modification of a desirable behaviour, HBV campaigns should be organised to sensitize  
5 HCWs on this disease. The campaign can include improved mass media program such as  
6 broadcasting health talk intermittently online and/or within other television programs.  
7 Adequate sensitization will reduce the rate of stigma associated to the disease and  
8 probably the rate of new infections among HCWs.  
9  
10  
11  
12  
13  
14

15 **Acknowledgement:** All HCWs who consented to participate in this study. Mr Akassong  
16 Dinga W. Dominique and Mr Ripa of CPC for helping out with part of the bench work.  
17 RHB for permitting the blood sample to be stored in the RHB laboratory freezer during  
18 sample collection. The students of the CPC virology laboratory for going through this  
19 work.  
20  
21  
22  
23  
24  
25

26 **Statement of Ethics:** Ethical clearance for the study was obtained from the National  
27 Ethics Committee of Cameroon (N°2017/02/871/CE/CNERSH/SP). Authorization to  
28 carry out research in the NWR was obtained from the regional delegation.  
29 Authorizations to access different hospitals were obtained from the directors or the in-  
30 charge of the hospitals. Authorization to access health centers was obtained from the  
31 District medical officer (DMO) and the chief of centers of the health facilities in this  
32 region. Written informed consent was obtained from each participant.  
33  
34  
35  
36  
37  
38  
39

40 **Authors' contribution:** AE and TC designed the study; AE and FV performed the  
41 experiments; AE drafted the manuscript; TC, NR, AL and KJR were involved in editing  
42 the manuscript; AE performed the statistical analysis. All authors read and approved  
43 the final manuscript.  
44  
45  
46  
47  
48

49 **Conflict of Interest:** The authors declare no conflict of interest.  
50  
51

52 **Funding:** This research received no specific grant from any funding agency in the  
53 public, commercial or not-for-profit sectors.  
54  
55  
56  
57  
58  
59  
60



**Data Availability:** Raw data is available on Figshare. Data is open access but authors should be consulted before exploiting data for any use other than better understanding of this paper. The link to raw data is given below:

<https://doi.org/10.6084/m9.figshare.9641771>.

## REFERENCE

1. Kathleen D. Hepatitis B: causes, symptoms and treatment. Medical News Today. 2018.
2. WHO. Updated fact sheet: Hepatitis B. In Geneva; 2018.
3. World Health Organization, Global Hepatitis Programme. Guidelines for the prevention, care, and treatment of persons with chronic hepatitis B infection [Internet]. Geneva: WHO; 2015 [cited 2018 Dec 11]. Available from: [http://apps.who.int/iris/bitstream/10665/154590/1/9789241549059\\_eng.pdf?ua=1&ua=1](http://apps.who.int/iris/bitstream/10665/154590/1/9789241549059_eng.pdf?ua=1&ua=1)
4. Njouom R, Tejiokem M, Texier G, Fontanet A. O-02: Prevalence of hepatitis B, hepatitis C and hepatitis D virus infections in Cameroon: results from a national population based survey (The ANRS 12289 project). J Viral Hepat [Internet]. 2015 [cited 2018 Dec 11];22(S2):1–2. Available from: [https://onlinelibrary.wiley.com/doi/abs/10.1111/jvh.01\\_12424](https://onlinelibrary.wiley.com/doi/abs/10.1111/jvh.01_12424)
5. Tarantola A, Abiteboul D, Rachline A. Infection risks following accidental exposure to blood or body fluids in health care workers: A review of pathogens transmitted in published cases. American Journal of Infection Control. 2006 Aug;34(6):367–75.
6. Dement J, Epling C, Ostbye T, Pompeii L, Hunt D. Blood and body fluid exposure risks among health care workers: results from the Duke Health and Safety Surveillance System. American Journal of Industrial Medicine. 2004 Dec;46(6):637–48.
7. WHO. Health Care Worker Safety. In Geneva: WHO; 2003.
8. Reis C, Heisler M, Amowitz L, Moreland S, Mafeni J, Anyamele C, et al. Discriminatory attitudes and practices by health workers toward patients with HIV/AIDS in Nigeria. PLOS Medicine. 2005 Jul 19;2(8):e246.

- 1  
2  
3 9. Shao E, Mboya I, Gunda D, Ruhangisa F, Temu E, Nkwama M, et al. Seroprevalence of  
4 hepatitis B virus infection and associated factors among healthcare workers in  
5 northern Tanzania. *BMC Infectious Disease*. 2018 Sep 21;18:474.  
6  
7  
8
- 9  
10 10. Abeje G, Azage M. Hepatitis B vaccine knowledge and vaccination status among  
11 health care workers of Bahir Dar City Administration, Northwest Ethiopia: a cross  
12 sectional study. *BMC Infect Dis [Internet]*. 2015 Dec [cited 2019 Jan 8];15(1).  
13 Available from: [http://bmcinfectdis.biomedcentral.com/articles/10.1186/s12879-](http://bmcinfectdis.biomedcentral.com/articles/10.1186/s12879-015-0756-8)  
14 [015-0756-8](http://bmcinfectdis.biomedcentral.com/articles/10.1186/s12879-015-0756-8)  
15  
16  
17
- 18  
19 11. Chinese Military Medical Experts Group in Sierra Leone, Qin Y-L, Li B, Zhou Y-S,  
20 Zhang X, Li L, et al. Prevalence and associated knowledge of hepatitis B infection  
21 among healthcare workers in Freetown, Sierra Leone. *BMC Infect Dis [Internet]*.  
22 2018 Dec [cited 2019 Aug 17];18(1). Available from:  
23 <https://bmcinfectdis.biomedcentral.com/articles/10.1186/s12879-018-3235-1>  
24  
25  
26  
27  
28
- 29 12. Ahmed T, Siham A, Asma A, Mawahib E, Zeinab S, Abdelgadir A. Knowledge, Attitude  
30 and Practice of Health Care Workers Regarding Transmission and Prevention of  
31 Hepatitis B Virus Infection, White Nile State, Sudan, 2013. *Am J Health Res*  
32 *[Internet]*. 2016 [cited 2019 Jan 8];4(2):18. Available from:  
33 [http://www.sciencepublishinggroup.com/journal/paperinfo?journalid=656&doi=1](http://www.sciencepublishinggroup.com/journal/paperinfo?journalid=656&doi=10.11648/j.ajhr.20160402.11)  
34 [0.11648/j.ajhr.20160402.11](http://www.sciencepublishinggroup.com/journal/paperinfo?journalid=656&doi=10.11648/j.ajhr.20160402.11)  
35  
36  
37  
38
- 39 13. Smith SM. Determining-Sample-Size. *qualtrics*. 2013;7.  
40  
41  
42
- 43 14. Tandi TE, Cho Y, Akam AJ-C, Afoh CO, Ryu SH, Choi MS, et al. Cameroon public health  
44 sector: shortage and inequalities in geographic distribution of health personnel. *Int J*  
45 *Equity Health [Internet]*. 2015 Dec [cited 2019 Feb 26];14(1). Available from:  
46 <http://www.equityhealthj.com/content/14/1/43>  
47  
48  
49
- 50 15. ul Haq N, Hassali MA, Shafie AA, Saleem F, Farooqui M, Aljadhey H. A cross sectional  
51 assessment of knowledge, attitude and practice towards Hepatitis B among healthy  
52 population of Quetta, Pakistan. *BMC Public Health [Internet]*. 2012 Dec [cited 2019  
53 Mar 22];12(1). Available from:  
54 <https://bmcpublihealth.biomedcentral.com/articles/10.1186/1471-2458-12-692>  
55  
56  
57  
58  
59  
60

- 1  
2  
3  
4  
5  
6  
7  
8  
9  
10  
11  
12  
13  
14  
15  
16  
17  
18  
19  
20  
21  
22  
23  
24  
25  
26  
27  
28  
29  
30  
31  
32  
33  
34  
35  
36  
37  
38  
39  
40  
41  
42  
43  
44  
45  
46  
47  
48  
49  
50  
51  
52  
53  
54  
55  
56  
57  
58  
59  
60
16. Al-Thaqafy MS, Balkhy HH, Memish Z, Makhdom YM, Ibrahim A, Al-Amri A, et al. Improvement of the low knowledge, attitude and practice of hepatitis B virus infection among Saudi national guard personnel after educational intervention. *BMC Res Notes* [Internet]. 2012 [cited 2019 Mar 22];5(1):597. Available from: <http://bmresnotes.biomedcentral.com/articles/10.1186/1756-0500-5-597>
  17. Setia S, Gambhir R, Kapoor V, Jindal G, Garg S. Attitudes and Awareness Regarding Hepatitis B and Hepatitis C Amongst Health-care Workers of a Tertiary Hospital in India. *Ann Med Health Sci Res*. 2013;3(4):551–8.
  18. Almustafa S, Almegdad S, Tariq A, Mutaz T, Awab M, Moneeb H, et al. Knowledge, attitude and practice of Hepatitis B among healthcare workers in relation to their vaccination status in Khartoum, Sudan, 2015: A cross-sectional study. *Sudan J Med Sci*. 2018 Mar 14;13(1):22–32.
  19. Demsiss W, Seid A, Fiseha T. Hepatitis B and C: Seroprevalence, knowledge, practice and associated factors among medicine and health science students in Northeast Ethiopia. Chemin I, editor. *PLOS ONE* [Internet]. 2018 May 15 [cited 2019 Aug 17];13(5):e0196539. Available from: <http://dx.plos.org/10.1371/journal.pone.0196539>
  20. Mirowsky J, Ross CE. Education, learned effectiveness and health <sup>1</sup>. *Lond Rev Educ* [Internet]. 2005 Jan [cited 2019 Jan 23];3(3):205–20. Available from: <http://www.ingentaconnect.com/content/ioep/clre/2005/00000003/00000003/art00003>
  21. Zimmerma E, Woolf S, Haley A. Understanding the Relationship Between Education and Health: A Review of the Evidence and an Examination of Community Perspectives. Agency for Healthcare Research and Quality; 2015.
  22. Ngekeng S, Chichom-Mefire A, Nde P, Nsagha D, Nkuigwe A, Tiogouo K, et al. Hepatitis B Prevalence, Knowledge and Occupational Factors among Health Care Workers in Fako Division, South West Region Cameroon. *Microbiology Research Journal International*. 2018 Apr 9;23(4):1–9.

- 1  
2  
3  
4  
5  
6  
7  
8  
9  
10  
11  
12  
13  
14  
15  
16  
17  
18  
19  
20  
21  
22  
23  
24  
25  
26  
27  
28  
29  
30  
31  
32  
33  
34  
35  
36  
37  
38  
39  
40  
41  
42  
43  
44  
45  
46  
47  
48  
49  
50  
51  
52  
53  
54  
55  
56  
57  
58  
59  
60
23. Tatsilong HOP, Noubiap JJN, Nansseu JRN, Aminde LN, Bigna JJR, Ndze VN, et al. Hepatitis B infection awareness, vaccine perceptions and uptake, and serological profile of a group of health care workers in Yaoundé, Cameroon. *BMC Public Health* [Internet]. 2016 Dec [cited 2018 Dec 11];16(1). Available from: <http://bmcpublikealth.biomedcentral.com/articles/10.1186/s12889-016-3388-z>
  24. Abongwa LE, Sunjo NS, Afah NG. Assessment of Knowledge, Attitude and Practice towards Hepatitis B among two rural communities of the Anglophone regions in Cameroon. *IRA-Int J Appl Sci* ISSN 2455-4499 [Internet]. 2016 Oct 3 [cited 2019 Mar 22];4(3):490. Available from: <http://research-advances.org/index.php/IRAJAS/article/view/496>
  25. Elzouki A-N, Elgamay SM, Zorgani A, Elahmer O. Hepatitis B and C status among health care workers in the five main hospitals in eastern Libya. *J Infect Public Health* [Internet]. 2014 Nov [cited 2019 Jan 12];7(6):534–41. Available from: <https://linkinghub.elsevier.com/retrieve/pii/S1876034114001063>
  26. Kateera F, Walker T, Mutesa L, Mutabazi V, Musabeyesu E, Mukabatsinda C, et al. Hepatitis B and C seroprevalence among health care workers in a tertiary hospital in Rwanda. *Trans R Soc Trop Med Hyg*. 2015 Jan 30;109(3):203–208.
  27. Mueller A, Stoetter L, Kalluvya S, Stich A, Majinge C, Weissbrich B, et al. Prevalence of hepatitis B virus infection among health care workers in a tertiary hospital in Tanzania. *BMC Infect Dis* [Internet]. 2015 [cited 2018 Dec 11];15(1). Available from: <http://bmcinfectdis.biomedcentral.com/articles/10.1186/s12879-015-1129-z>
  28. Ziraba A, Bwogi J, Namale A, Wainaina C, Mayanja-Kizza H. Sero-prevalence and risk factors for hepatitis B virus infection among health care workers in a tertiary hospital in Uganda. *BMC Infectious Disease*. 2010 Jun 29;10:191.
  29. Ndongo CB, Eteki L, Siedner M, Mbaye R, Chen J, Ntone R, et al. Prevalence and vaccination coverage of Hepatitis B among healthcare workers in Cameroon: A national seroprevalence survey. *J Viral Hepat* [Internet]. 2018 Dec 1 [cited 2018 Dec 11];25(12):1582–7. Available from: <https://onlinelibrary.wiley.com/doi/abs/10.1111/jvh.12974>

- 1  
2  
3 30. Ott JJ, Stevens GA, Groeger J, Wiersma ST. Global epidemiology of hepatitis B virus  
4 infection: New estimates of age-specific HBsAg seroprevalence and endemicity.  
5 Vaccine [Internet]. 2012 Mar [cited 2018 Dec 11];30(12):2212–9. Available from:  
6 <https://linkinghub.elsevier.com/retrieve/pii/S0264410X11020779>  
7  
8  
9  
10  
11 31. World Health Organization. Myths and facts about immunization,. WHO Regional  
12 Office for Europe; 2015.  
13  
14  
15  
16  
17  
18  
19  
20  
21  
22  
23  
24  
25  
26  
27  
28  
29  
30  
31  
32  
33  
34  
35  
36  
37  
38  
39  
40  
41  
42  
43  
44  
45  
46  
47  
48  
49  
50  
51  
52  
53  
54  
55  
56  
57  
58  
59  
60

For peer review only

**Table 1: Baseline characteristics in the studied population**

| Variables                         |                             | Frequency (398)    | Percentage |
|-----------------------------------|-----------------------------|--------------------|------------|
| <b>Sex</b>                        | Male                        | 126                | 31.7       |
|                                   | Female                      | 272                | 68.3       |
| <b>Age Intervals</b>              | 16-25                       | 167                | 42.0       |
|                                   | 26-35                       | 157                | 39.4       |
|                                   | 36-45                       | 50                 | 12.6       |
|                                   | 46-65                       | 24                 | 6.0        |
| <b>Level of Education</b>         | Secondary and below         | 39                 | 9.8        |
|                                   | Diploma                     | 59                 | 14.8       |
|                                   | SRN/SRM                     | 55                 | 13.8       |
|                                   | HND                         | 103                | 25.9       |
|                                   | BSc                         | 118                | 29.6       |
| <b>Duration In the Occupation</b> | ≤ 1 year                    | 72                 | 18.1       |
|                                   | 2 – 4 years                 | 218                | 54.8       |
|                                   | 5 – 9 years                 | 55                 | 13.8       |
|                                   | ≥ 10 year                   | 53                 | 13.3       |
| <b>HCWs category</b>              | Nurses                      | 224                | 56.3       |
|                                   | Lab Technicians             | 90                 | 22.6       |
|                                   | Medical Doctors             | 17                 | 4.3        |
|                                   | Dentist                     | 15                 | 3.8        |
|                                   | Pharmacist                  | 8                  | 2.0        |
|                                   | Sanitary Workers            | 44                 | 11.1       |
|                                   | <b>Role In the Hospital</b> | Biomedical Student | 149        |
|                                   | Biomedical Personnel        | 249                | 62.6       |
| <b>Residence</b>                  | Urban                       | 335                | 84.2       |
|                                   | Semi-Urban                  | 18                 | 4.5        |
|                                   | Rural                       | 45                 | 11.3       |

Data are n and %.

**Table 2: Knowledge on route of HBV transmission**

| Questions    | Correct Response n (%) |                        |                        |                |                  |                         |               |            |
|--------------|------------------------|------------------------|------------------------|----------------|------------------|-------------------------|---------------|------------|
|              | Nurses (n=224)         | Medical Doctors (n=17) | Lab Technicians (n=90) | Dentist (n=15) | Pharmacist (n=8) | Sanitary Workers (n=44) | Total (n=398) |            |
| Heard of HBV | Yes                    | 199 (88.8)             | 16 (94.1)              | 86 (95.6)      | 12 (80.0)        | 5 (62.5)                | 20 (45.5)     | 338 (84.9) |
|              | No                     | 25 (11.2)              | 1 (5.9)                | 4 (4.4)        | 3 (20.0)         | 3 (37.5)                | 24 (54.5)     | 60 (15.1)  |

|                          |     |            |           |           |           |          |           |            |
|--------------------------|-----|------------|-----------|-----------|-----------|----------|-----------|------------|
| Sexually transmitted     | Yes | 183 (81.7) | 16 (94.1) | 82 (91.1) | 11 (73.3) | 3 (37.5) | 18 (40.9) | 313 (78.6) |
|                          | No  | 41 (18.3)  | 1 (5.9)   | 8 (8.9)   | 4 (26.7)  | 5 (62.5) | 26 (59.1) | 85 (21.4)  |
| Vertical transmission    | Yes | 179 (79.9) | 14 (82.4) | 69 (76.7) | 9 (60.0)  | 5 (62.5) | 16 (36.4) | 292 (73.4) |
|                          | No  | 45 (20.1)  | 3 (17.6)  | 21 (23.3) | 6 (40.0)  | 3 (37.5) | 28 (63.6) | 106 (26.6) |
| Contact with body fluids | Yes | 191 (85.3) | 15 (88.2) | 84 (93.3) | 11 (73.3) | 5 (62.5) | 18 (40.9) | 324 (81.4) |
|                          | No  | 33 (14.7)  | 2 (11.8)  | 6 (6.7)   | 4 (26.7)  | 3 (37.5) | 26 (59.1) | 74 (18.6)  |
| Knowledge on HBV         | Yes | 162 (72.3) | 13 (76.5) | 68 (75.6) | 9 (60.0)  | 3 (37.5) | 14 (31.8) | 269 (67.6) |
|                          | No  | 62 (27.7)  | 4 (23.5)  | 22 (24.4) | 6 (40.0)  | 5 (62.5) | 30 (62.2) | 129 (32.4) |

Data are n(%).

**Table 3: Prevalence of HBV infection among HCWs**

| Characteristic               |                             | Knowledge on route of transmission |                | Positive attitude |              | HBsAg Positivity |         |
|------------------------------|-----------------------------|------------------------------------|----------------|-------------------|--------------|------------------|---------|
|                              |                             | n(%)                               | p-value        | n(%)              | p-value      | n(%)             | p-value |
| Sex                          | Male (n=126)                | 88 (69.8)                          | 0.513          | 61 (48.4)         | 0.224        | 9 (7.1)          | 0.132   |
|                              | Female (n=272)              | 181 (66.5)                         |                | 114 (41.9)        |              | 33 (12.1)        |         |
| Age Group                    | 16-25 (n=167)               | 118 (70.7)                         | 0.169          | 74 (44.3)         | 0.456        | 14 (8.4)         | 0.532   |
|                              | 26-35 (n=157)               | 109 (69.4)                         |                | 72 (45.9)         |              | 19 (12.2)        |         |
|                              | 36-45 (n=50)                | 29 (58.0)                          |                | 17 (34.0)         |              | 5 (10.0)         |         |
|                              | 46-65 (n=24)                | 13 (54.2)                          |                | 12 (50.0)         |              | 4 (16.7)         |         |
| Level of education           | ≤ Secondary (n=39)          | 11 (28.2)                          | < <b>0.001</b> | 14 (35.9)         | 0.186        | 3 (7.7)          | 0.771   |
|                              | Diploma (n=59)              | 36 (61.0)                          |                | 23 (39.0)         |              | 6 (10.2)         |         |
|                              | SRN/SRM (n=55)              | 36 (65.5)                          |                | 22 (40.0)         |              | 9 (16.4)         |         |
|                              | HND (n=103)                 | 79 (76.7)                          |                | 42 (40.8)         |              | 10 (9.7)         |         |
|                              | BSc (n=118)                 | 88 (74.6)                          |                | 64 (54.2)         |              | 12 (10.2)        |         |
|                              | Post Graduate (n=24)        | 19 (79.2)                          |                | 10 (41.7)         |              | 2 (8.3)          |         |
| Duration in the occupation   | ≤ 1 year (n=72)             | 45 (62.5)                          | 0.649          | 30 (41.7)         | 0.217        | 7 (9.7)          | 0.601   |
|                              | 2-4 years (n=218)           | 157 (72.0)                         |                | 101 (46.3)        |              | 23 (10.6)        |         |
|                              | 5-9 years (n=55)            | 34 (61.8)                          |                | 21 (38.2)         |              | 7 (12.7)         |         |
|                              | ≥ 10 year (n=53)            | 33 (62.3)                          |                | 23 (43.4)         |              | 5 (9.4)          |         |
| HCWs category                | Nurses (n=224)              | 162 (72.3)                         | < <b>0.001</b> | 87 (38.8)         | <b>0.003</b> | 28 (12.5)        | 0.640   |
|                              | Lab Tech (n=90)             | 68 (75.6)                          |                | 54 (60.0)         |              | 8 (8.9)          |         |
|                              | Medical doctors (n=17)      | 13 (76.5)                          |                | 9 (52.9)          |              | 1 (5.9)          |         |
|                              | Dentist (N=15)              | 9 (60.0)                           |                | 9 (60.0)          |              | 2 (13.3)         |         |
|                              | Pharmacist (N=8)            | 3 (37.5)                           |                | 2 (25.0)          |              | 1 (12.5)         |         |
|                              | Sanitary workers (N=44)     | 14 (31.8)                          |                | 14 (31.8)         |              | 2 (4.5)          |         |
|                              | Biomedical students (N=149) | 104 (69.8)                         | 0.466          | 65 (43.6)         | 0.914        | 13 (8.7)         | 0.359   |
| Biomedical personnel (N=249) | 165 (66.3)                  |                                    | 110 (44.2)     |                   | 29 (11.6)    |                  |         |

|           |                   |            |       |            |       |           |       |
|-----------|-------------------|------------|-------|------------|-------|-----------|-------|
| Residence | Urban (N=335)     | 229 (68.4) | 0.523 | 152 (45.4) | 0.408 | 38 (11.3) | 0.492 |
|           | Semi-urban (N=18) | 10 (55.6)  |       | 6 (33.3)   |       | 1 (5.6)   |       |
|           | Rural (N=45)      | 30 (66.7)  |       | 17 (37.8)  |       | 3 (6.7)   |       |

Data are n(%); p-value<0.05 is considered significant.

**Table 4: Association between knowledge, attitude and prevalence of HBsAg**

| Characteristics  |          | Reactivity to HBsAg |      |         | Unadjusted Risk of HBsAg |               |
|------------------|----------|---------------------|------|---------|--------------------------|---------------|
|                  |          | No                  | %    | p-value | OR                       | 95% CI        |
| Knowledge (n=42) | Adequate | 26                  | 61.9 | 0.405   | 1.323                    | 0.683 - 2.564 |
|                  | Poor     | 16                  | 38.1 |         |                          |               |
| Attitude (n=270) | Positive | 19                  | 45.2 | 0.861   | 0.994                    | 0.497 - 1.795 |
|                  | Negative | 23                  | 54.8 |         |                          |               |

p-value<0.05 is considered to be significant.

**Table 5: Attitude of HCWs towards HBV**

| Attitudes                            |          | Health Care Worker n (%) |               |                        |                   |                     |                                |                  |
|--------------------------------------|----------|--------------------------|---------------|------------------------|-------------------|---------------------|--------------------------------|------------------|
|                                      |          | Nurses<br>(n=224)        | MDs<br>(n=17) | Lab<br>Techs<br>(n=90) | Dentist<br>(n=15) | Pharmacist<br>(n=8) | Auxiliary<br>workers<br>(n=44) | Total<br>(n=398) |
| Attitude towards<br>infected persons | Good     | 137 (61.2)               | 13 (76.5)     | 70 (77.8)              | 13 (86.7)         | 5 (62.7)            | 32 (72.7)                      | 270 (67.8)       |
|                                      | Bad      | 87 (38.8)                | 4 (23.5)      | 20 (22.2)              | 2 (13.3)          | 3 (37.5)            | 12 (27.3)                      | 128 (32.2)       |
| Practice safe<br>hygiene             | Yes      | 193 (86.2)               | 14 (82.4)     | 63 (70.0)              | 14 (93.3)         | 6 (75.0)            | 27 (61.4)                      | 317 (79.6)       |
|                                      | No       | 31 (13.8)                | 3 (17.6)      | 27 (30.0)              | 1 (6.7)           | 2 (25.0)            | 17 (38.6)                      | 81 (20.4)        |
| Wears gloves<br>often                | Yes      | 177 (79.0)               | 15 (88.2)     | 82 (91.1)              | 10 (66.7)         | 4 (50.0)            | 22 (50.0)                      | 310 (77.9)       |
|                                      | No       | 47 (21.0)                | 2 (11.8)      | 8 (8.9)                | 5 (33.3)          | 4 (50.0)            | 22 (50.0)                      | 88 (22.1)        |
| Frequency of<br>needle stick injury  | Often    | 10 (4.5)                 | 0 (0.0)       | 1 (1.1)                | 0 (0.0)           | 0 (0.0)             | 3 (6.8)                        | 14 (3.5)         |
|                                      | Rarely   | 214 (95.5)               | 17 (100.0)    | 89 (98.9)              | 15 (100.0)        | 8 (100.0)           | 41 (93.2)                      | 384 (96.5)       |
| Received 1 dose of<br>vaccine        | Yes      | 43 (19.2)                | 4 (23.5)      | 28 (31.1)              | 10 (66.7)         | 3 (37.5)            | 5 (11.4)                       | 93 (23.4)        |
|                                      | No       | 181 (80.8)               | 13 (76.5)     | 62 (68.9)              | 5 (33.3)          | 5 (62.5)            | 39 (88.6)                      | 305 (76.6)       |
| Sexually<br>promiscuous              | Yes      | 46 (20.5)                | 4 (23.5)      | 10 (11.1)              | 6 (40.0)          | 2 (25.0)            | 16 (36.4)                      | 84 (21.1)        |
|                                      | No       | 178 (79.5)               | 13 (76.5)     | 80 (88.9)              | 9 (60.0)          | 6 (75.0)            | 28 (63.6)                      | 314 (78.9)       |
| General Attitude                     | Positive | 87 (38.8)                | 9 (52.9)      | 54 (60.0)              | 9 (60.0)          | 2 (25.0)            | 14 (31.8)                      | 175 (44.0)       |
|                                      | Negative | 137 (61.2)               | 8 (47.1)      | 36 (40.0)              | 6 (40.0)          | 6 (75.0)            | 30 (68.2)                      | 223 (56.0)       |

Data are n(%).



## STROBE (Strengthening The Reporting of OBServational Studies in Epidemiology) Checklist

A checklist of items that should be included in reports of observational studies. You must report the page number in your manuscript where you consider each of the items listed in this checklist. If you have not included this information, either revise your manuscript accordingly before submitting or note N/A.

**Note:** An Explanation and Elaboration article discusses each checklist item and gives methodological background and published examples of transparent reporting. The STROBE checklist is best used in conjunction with this article (freely available on the Web sites of PLoS Medicine at <http://www.plosmedicine.org/>, Annals of Internal Medicine at <http://www.annals.org/>, and Epidemiology at <http://www.epidem.com/>). Information on the STROBE Initiative is available at [www.strobe-statement.org](http://www.strobe-statement.org).

| Section and Item     | Item No. | Recommendation                                                                                                                                                                                                                                                                                                                                                                                                                                                                 | Reported on Page No. |
|----------------------|----------|--------------------------------------------------------------------------------------------------------------------------------------------------------------------------------------------------------------------------------------------------------------------------------------------------------------------------------------------------------------------------------------------------------------------------------------------------------------------------------|----------------------|
| Title and Abstract   | 1        | (a) Indicate the study's design with a commonly used term in the title or the abstract                                                                                                                                                                                                                                                                                                                                                                                         |                      |
|                      |          | (b) Provide in the abstract an informative and balanced summary of what was done and what was found                                                                                                                                                                                                                                                                                                                                                                            |                      |
| <b>Introduction</b>  |          |                                                                                                                                                                                                                                                                                                                                                                                                                                                                                |                      |
| Background/Rationale | 2        | Explain the scientific background and rationale for the investigation being reported                                                                                                                                                                                                                                                                                                                                                                                           |                      |
| Objectives           | 3        | State specific objectives, including any prespecified hypotheses                                                                                                                                                                                                                                                                                                                                                                                                               |                      |
| <b>Methods</b>       |          |                                                                                                                                                                                                                                                                                                                                                                                                                                                                                |                      |
| Study Design         | 4        | Present key elements of study design early in the paper                                                                                                                                                                                                                                                                                                                                                                                                                        |                      |
| Setting              | 5        | Describe the setting, locations, and relevant dates, including periods of recruitment, exposure, follow-up, and data collection                                                                                                                                                                                                                                                                                                                                                |                      |
| Participants         | 6        | (a) <i>Cohort study</i> —Give the eligibility criteria, and the sources and methods of selection of participants. Describe methods of follow-up<br><br><i>Case-control study</i> —Give the eligibility criteria, and the sources and methods of case ascertainment and control selection. Give the rationale for the choice of cases and controls<br><br><i>Cross-sectional study</i> —Give the eligibility criteria, and the sources and methods of selection of participants |                      |
|                      |          | (b) <i>Cohort study</i> —For matched studies, give matching criteria and number of exposed and unexposed<br><br><i>Case-control study</i> —For matched studies, give matching criteria and the number of controls per case                                                                                                                                                                                                                                                     |                      |
| Variables            | 7        | Clearly define all outcomes, exposures, predictors, potential confounders, and effect modifiers. Give diagnostic criteria, if applicable                                                                                                                                                                                                                                                                                                                                       |                      |

| Section and Item             | Item No. | Recommendation                                                                                                                                                                                                                                                                                            | Reported on Page No. |
|------------------------------|----------|-----------------------------------------------------------------------------------------------------------------------------------------------------------------------------------------------------------------------------------------------------------------------------------------------------------|----------------------|
| Data Sources/<br>Measurement | 8*       | For each variable of interest, give sources of data and details of methods of assessment (measurement). Describe comparability of assessment methods if there is more than one group                                                                                                                      |                      |
| Bias                         | 9        | Describe any efforts to address potential sources of bias                                                                                                                                                                                                                                                 |                      |
| Study Size                   | 10       | Explain how the study size was arrived at                                                                                                                                                                                                                                                                 |                      |
| Quantitative Variables       | 11       | Explain how quantitative variables were handled in the analyses. If applicable, describe which groupings were chosen and why                                                                                                                                                                              |                      |
| Statistical Methods          | 12       | (a) Describe all statistical methods, including those used to control for confounding                                                                                                                                                                                                                     |                      |
|                              |          | (b) Describe any methods used to examine subgroups and interactions                                                                                                                                                                                                                                       |                      |
|                              |          | (c) Explain how missing data were addressed                                                                                                                                                                                                                                                               |                      |
|                              |          | (d) <i>Cohort study</i> —If applicable, explain how loss to follow-up was addressed<br><i>Case-control study</i> —If applicable, explain how matching of cases and controls was addressed<br><i>Cross-sectional study</i> —If applicable, describe analytical methods taking account of sampling strategy |                      |
|                              |          | (e) Describe any sensitivity analyses                                                                                                                                                                                                                                                                     |                      |
| <b>Results</b>               |          |                                                                                                                                                                                                                                                                                                           |                      |
| Participants                 | 13*      | (a) Report numbers of individuals at each stage of study—eg numbers potentially eligible, examined for eligibility, confirmed eligible, included in the study, completing follow-up, and analysed                                                                                                         |                      |
|                              |          | (b) Give reasons for non-participation at each stage                                                                                                                                                                                                                                                      |                      |
|                              |          | (c) Consider use of a flow diagram                                                                                                                                                                                                                                                                        |                      |
| Descriptive Data             | 14*      | (a) Give characteristics of study participants (eg demographic, clinical, social) and information on exposures and potential confounders                                                                                                                                                                  |                      |
|                              |          | (b) Indicate number of participants with missing data for each variable of interest                                                                                                                                                                                                                       |                      |
|                              |          | (c) <i>Cohort study</i> —Summarise follow-up time (eg, average and total amount)                                                                                                                                                                                                                          |                      |
| Outcome Data                 | 15*      | <i>Cohort study</i> —Report numbers of outcome events or summary measures over time                                                                                                                                                                                                                       |                      |
|                              |          | <i>Case-control study</i> —Report numbers in each exposure category, or summary measures of exposure                                                                                                                                                                                                      |                      |
|                              |          | <i>Cross-sectional study</i> —Report numbers of outcome events or summary measures                                                                                                                                                                                                                        |                      |

| Section and Item         | Item No. | Recommendation                                                                                                                                                                                               | Reported on Page No. |
|--------------------------|----------|--------------------------------------------------------------------------------------------------------------------------------------------------------------------------------------------------------------|----------------------|
| Main Results             | 16       | (a) Give unadjusted estimates and, if applicable, confounder-adjusted estimates and their precision (eg, 95% confidence interval). Make clear which confounders were adjusted for and why they were included |                      |
|                          |          | (b) Report category boundaries when continuous variables were categorized                                                                                                                                    |                      |
|                          |          | (c) If relevant, consider translating estimates of relative risk into absolute risk for a meaningful time period                                                                                             |                      |
| Other Analyses           | 17       | Report other analyses done—eg analyses of subgroups and interactions, and sensitivity analyses                                                                                                               |                      |
| <b>Discussion</b>        |          |                                                                                                                                                                                                              |                      |
| Key Results              | 18       | Summarise key results with reference to study objectives                                                                                                                                                     |                      |
| Limitations              | 19       | Discuss limitations of the study, taking into account sources of potential bias or imprecision. Discuss both direction and magnitude of any potential bias                                                   |                      |
| Interpretation           | 20       | Give a cautious overall interpretation of results considering objectives, limitations, multiplicity of analyses, results from similar studies, and other relevant evidence                                   |                      |
| Generalisability         | 21       | Discuss the generalisability (external validity) of the study results                                                                                                                                        |                      |
| <b>Other Information</b> |          |                                                                                                                                                                                                              |                      |
| Funding                  | 22       | Give the source of funding and the role of the funders for the present study and, if applicable, for the original study on which the present article is based                                                |                      |

\*Give information separately for cases and controls in case-control studies and, if applicable, for exposed and unexposed groups in cohort and cross-sectional studies.

**Once you have completed this checklist, please save a copy and upload it as part of your submission. DO NOT include this checklist as part of the main manuscript document. It must be uploaded as a separate file.**

# BMJ Open

## KNOWLEDGE, ATTITUDE AND PREVALENCE OF HEPATITIS B VIRUS AMONG HEALTH CARE WORKERS: A CROSS-SECTIONAL HOSPITAL-BASED STUDY, BAMENDA HEALTH DISTRICT, NWR, CAMEROON.

|                                 |                                                                                                                                                                                                                                                                                                                                                                                                                                                                                       |
|---------------------------------|---------------------------------------------------------------------------------------------------------------------------------------------------------------------------------------------------------------------------------------------------------------------------------------------------------------------------------------------------------------------------------------------------------------------------------------------------------------------------------------|
| Journal:                        | <i>BMJ Open</i>                                                                                                                                                                                                                                                                                                                                                                                                                                                                       |
| Manuscript ID                   | bmjopen-2019-031075.R2                                                                                                                                                                                                                                                                                                                                                                                                                                                                |
| Article Type:                   | Research                                                                                                                                                                                                                                                                                                                                                                                                                                                                              |
| Date Submitted by the Author:   | 19-Nov-2019                                                                                                                                                                                                                                                                                                                                                                                                                                                                           |
| Complete List of Authors:       | Akazong, Etheline; University of Dschang Faculty of Sciences, Department of Biochemistry<br>Tume, Christopher; University of Dschang Faculty of Sciences, Department of Biochemistry; University of Bamenda, Department of Biochemistry<br>Njouom, Richard; Centre Pasteur Cameroun<br>Ayong, Lawrence; Centre Pasteur Cameroun<br>Fondoh, Victor; Regional Hospital Bamenda Laboratory<br>Kuiate, Jules-Roger; University of Dschang Faculty of Sciences, Department of Biochemistry |
| <b>Primary Subject Heading</b>: | Public health                                                                                                                                                                                                                                                                                                                                                                                                                                                                         |
| Secondary Subject Heading:      | Epidemiology                                                                                                                                                                                                                                                                                                                                                                                                                                                                          |
| Keywords:                       | Health care workers, HBV, HBsAg, Attitude, Knowledge, Cameroon                                                                                                                                                                                                                                                                                                                                                                                                                        |
|                                 |                                                                                                                                                                                                                                                                                                                                                                                                                                                                                       |

SCHOLARONE™  
Manuscripts

1  
2  
3 **KNOWLEDGE, ATTITUDE AND PREVALENCE OF HEPATITIS B VIRUS AMONG**  
4 **HEALTH CARE WORKERS: A CROSS-SECTIONAL HOSPITAL-BASED STUDY,**  
5 **BAMENDA HEALTH DISTRICT, NWR, CAMEROON.**  
6  
7  
8  
9

10 Akazong Etheline<sup>1</sup>, Tume Christopher<sup>1,3</sup>, Njouom Richard<sup>2</sup>, Ayong Lawrence<sup>2</sup>, Fondoh  
11 Victor<sup>4</sup>, Kuate Jules-Roger<sup>1\*</sup>.

12  
13  
14 <sup>1</sup> Department of Biochemistry, University of Dschang, Cameroon

15 <sup>2</sup> Centre Pasteur of Cameroon, Yaoundé, Cameroon

16  
17 <sup>3</sup> Department of Biochemistry, University of Bamenda, Cameroon

18  
19 <sup>4</sup> Regional Hospital Bamenda Laboratory, Cameroon  
20  
21

22  
23 Short title: Akazong *et al.*; 2018.  
24  
25

26 \*Corresponding Author

27 Kuate Jules-Roger

28 Department of Biochemistry

29 University of Dschang

30 BP 67, Dschang, Cameroon

31 Fax: +237 234 691 506

32  
33 Tel: +237 699 679 135

34  
35 Email: [jules.kuate@univ-dschang.org](mailto:jules.kuate@univ-dschang.org)  
36  
37  
38  
39  
40  
41  
42  
43  
44  
45  
46  
47  
48  
49  
50  
51  
52  
53  
54  
55  
56  
57  
58  
59  
60

## ABSTRACT

**Introduction:** The Hepatitis B Virus (HBV) is a blood borne virus which can be transmitted via percutaneous and mucocutaneous exposure to infected body fluid. Health care workers (HCWs) who continuously are exposed to different body fluids are at an increased risk of contracting and transmitting this virus. It is thus important to evaluate the knowledge and attitude of HCWs towards HBV, and the prevalence of HBV infection among them.

**Method:** This cross-sectional study was carried out between April and September, 2017. Overall, 398 HCWs were recruited for this study. Knowledge on the route of HBV transmission and attitude towards HBV was evaluated using a well-structured questionnaire. Hepatitis B surface antigen (HBsAg) positivity was obtained using the Monolisa HBsAg ULTRA kit (Bio-Rad). Data was analyzed using Statistical Package for the Social Sciences version 20 (SPSS v. 20).

**Results:** Among the HCWs who participated in this study, 338 (84.9%) HCWs had heard of HBV, 269 (67.6%) of them had adequate knowledge on the route of HBV transmission. Medical doctors were the most knowledgeable among biomedical workers and students (76.5%). Stigma rate was highest among nurses 87 (38.8%). Prevalence of HBsAg positivity was high 42 (10.6%) given that there is an efficient and available vaccine. Overall, over 70% of HCWs invited to participate in this study responded.

**Conclusion:** Knowledge on the route of HBV transmission was fair, the level of stigmatization of HBV infected patients and the prevalence of HBV infection was high in this study. A sensitization campaign should be carried out to educate HCWs on HBV, thus reducing the level of stigma associated with HBV as well as the probability of contacting HBV as a nosocomial infection.

**Key words:** Health care workers, HBV, HBsAg, Attitude, Knowledge, Vaccination, Cameroon.

**Abbreviations:** HBV: Hepatitis B virus, MD: Medical doctor, Lab tech: Laboratory technician, HCWs: Health care workers, SRN/SRM: State Registered Nurse/Midwife, NWR: North West Region, KAP: Knowledge, attitude and practice/prevalence, HND: Higher National Diploma, BSc: Bachelor of Science, HBsAg: Hepatitis B surface antigen,

1  
2  
3 ELISA: Enzyme-linked immunosorbent assay, CMA: Centre medical d'arrondissement  
4 (district medical centers), MOE: Margin of error.

5  
6  
7 **Strength:**

- 8  
9  
10  
11  
12  
13  
14  
15  
16  
17  
18  
19  
20  
21  
22  
23  
24  
25  
26  
27  
28  
29  
30  
31  
32  
33  
34  
35  
36  
37  
38  
39  
40  
41  
42  
43  
44  
45  
46  
47  
48  
49  
50  
51  
52  
53  
54  
55  
56  
57  
58  
59  
60
- Monalisa™ HBsAg ULTRA ELISA kit with 100% sensitivity and specificity of 99.28% was used to determine current HBV infection (HBsAg positivity).
  - Questionnaires were answered in the presence of the researcher to prevent participants from discussing answers or getting answers online.
  - Stratified sampling technique, which permits estimation of population parameters for groups within population was used for sampling.

21  
22  
23  
24  
25  
26  
27  
28  
29  
30  
31  
32  
33  
34  
35  
36  
37  
38  
39  
40  
41  
42  
43  
44  
45  
46  
47  
48  
49  
50  
51  
52  
53  
54  
55  
56  
57  
58  
59  
60

**Limitation:**

- Information on knowledge and attitude were self-reported, and chances of individual bias cannot be completely overruled.
- The present study covers a cross-section of health professionals, so caution should be taken while generalizing the results.

## INTRODUCTION

The hepatitis B virus (HBV) is an enveloped virus of the hepadnavirus family that infects the liver, causing hepatocellular necrosis and inflammation. HBV, spread by percutaneous or mucosal exposure to infected blood and various body fluids can either cause an acute or chronic disease (1). An estimated 257 million people are living with HBV (2), and about 20% to 30% of those who become chronically infected will develop complications. Currently available treatments fail to eradicate the virus in most of those treated, necessitating potentially lifelong treatment (3) and approximately 650,000 people die annually due to chronic hepatitis B (CHB) (3). Cameroon, a sub-Saharan African country, is considered hyper-endemic with a prevalence rate of HBV infection estimated at 11.5% (4).

Health care workers (HCW) who are frequently in contact with blood and other body fluids in the course of their work are at higher risk of exposure to blood borne viral diseases such as HBV, Hepatitis C Virus (HCV) and Human immunodeficiency virus (HIV) (5–7). Among the HCWs worldwide, about 2 million HCWs are exposed and about 70,000 are infected with HBV annually (7). The World Health Organization (WHO) global burden of the disease showed that 37% of HBV among HCWs was the result of occupational exposure resulting from sharps injuries to HCWs (2). More than 90% of these infections occur in developing countries (7). The risk of occupational infections in developing countries is intensified by a variety of factors, comprising but not restricted to, overcrowding in hospitals, lower HCWs:patient ratio, insufficient or absence of basic safety and protection equipment, reutilizing/reprocessing contaminated needles and sharp instruments and partial awareness of exposure-risk to blood and body fluid (5).

Although needle stick injury hepatitis sero-conversion is somewhat rare, the costs of treatment and anxiety about the possible consequences of an exposure are serious. This might be why some HCWs refuse to service patients with blood borne viral diseases such as HBV. Prevention through immunization and increasing knowledge thus stand out as the safest strategy against the high prevalence of viral hepatitis among HCWs. Knowing facts and having proper awareness, can influence the attitudes of HCWs and control the menace of the disease (8). A number of studies in Africa have evaluated the level of the knowledge, attitude, and practice of HCWs toward HBV and the vaccination



1  
2  
3 status of HCWs (9–12). The low level of vaccination and the high prevalence of HBsAg  
4 recorded in different studies might be justified by the low level of knowledge on the  
5 route of transmission among HCWs (13–16).  
6  
7  
8  
9

10 Prevention is still a recommended safeguard against an epidemic of viral hepatitis.  
11 Knowledge and attitudes of the clinician play a key role in prevention and spread of  
12 infection. By knowing facts, having proper awareness, and attitudes, the menace of this  
13 disease can be prevented to a great extent. Therefore, the objectives of the present  
14 study are to assess the knowledge and attitudes of HCWs regarding HBV, and to  
15 compare their knowledge and attitude score to the prevalence of HBV infection.  
16  
17  
18  
19  
20  
21

## 22 **MATERIALS AND METHODS**

### 23 **Study design and setting**

24 This cross-sectional hospital-based study was conducted among HCWs in the Bamenda  
25 health district, North West Region (NWR) of Cameroon. Samples were collected  
26 between April and September 2017, and included 22 health facilities in this health  
27 district (among which were 1 regional hospital, 3 CMAs, 6 mission hospitals, 5  
28 government health centers and 7 private hospitals). Over 70% of HCWs in the various  
29 health facilities were recruited for this study. Testing stations were set up in the various  
30 wards in the health facilities.  
31  
32  
33  
34  
35  
36  
37  
38  
39

### 40 **Ethical consideration**

41 Ethical clearance for the study was obtained from the National Ethics Committee of  
42 Cameroon (N°2017/02/871/CE/CNERSH/SP). Authorization to carry out research in  
43 the NWR was obtained from the regional delegation. Authorizations to access different  
44 hospitals were obtained from the directors or the in-charge of the hospitals.  
45 Authorization to access health centers was obtained from the District medical officer  
46 and the chief of centers of the health facilities. Written informed consent was obtained  
47 from each participant.  
48  
49  
50  
51  
52  
53  
54  
55

### 56 **Study participants**

57 HCWs present in the selected hospitals during the study period were informed and  
58 invited to participate in the study. HCWs in the study comprised of medical doctors,  
59  
60

1  
2  
3 nurses, dentists, pharmacists, laboratory technicians, sanitary workers and biomedical  
4 students working in the Bamenda health district during the study period.  
5  
6  
7

### 8 **Strategy for Recruiting Target Population**

9  
10 Information was given through the chief medical doctor (where applicable), the general  
11 supervisor and the heads of units who were contacted respectively and asked to inform  
12 their staff of the project. An information notice was placed on the hospital and ward  
13 notice board where applicable, to inform the hospital staff of the study objectives and  
14 period during which the study was to be carried out. Finally, a one to one contact was  
15 used to reach a number of staff.  
16  
17  
18  
19  
20  
21

### 22 **Sample Size and Justification**

23  
24 Sample size was determined using the Population Proportion Sample Size formula  
25 proposed by Scott Smith (13),  $X = Z\text{-score} * SD * (1 - SD) / MOE$ . The proportion of  
26 HCWs in the North-West Region was obtained from a registry published in 2015 (14)  
27 which published the national proportions of HCWs per region. The confidence level was  
28 95% giving a Z-Score of 1.96, a margin of error (MOE) of +/- 5 and a standard deviation  
29 (SD) of 0.5. Using this formula, the calculated sample size was 385 persons.  
30  
31  
32  
33  
34  
35

### 36 **Sample collection**

37  
38 Participants who consented to the study completed a structured questionnaire which  
39 was used to collect data on sociodemographic characteristics, HBV exposure risks, HBV  
40 vaccination and attitude towards HBV. Stratified sampling technique, which permits  
41 estimation of population parameters for groups within population was used for  
42 sampling. The questionnaire was self-administered and contained both closed and  
43 open-ended questions to assess the perspectives of the respondents towards HBV.  
44 Participants who could read and write completed the form by themselves while those  
45 who could neither read nor write were assisted. The questionnaire was filled in the  
46 presence of the researcher to prevent participants from discussing answers or getting  
47 answers online. Pre-designed and pre-tested, semi-structured questionnaire items with  
48 response options was developed based on KAP surveys with similar objectives (15–17).  
49 Questionnaire was validated following guidelines proposed by Jain *et al.*, 2016 (18)  
50 Serum was obtained from 4ml of blood collected from study participants into a red cap  
51  
52  
53  
54  
55  
56  
57  
58  
59  
60

(dry) tube. Identification number was used to link participant's laboratory results and the questionnaire. The questionnaire is present online as a supplementary file.

### **Definition for scoring knowledge**

Knowledge on the route of HBV transmission was assessed using 3 questions directly linked with the route of HBV infection. Adequate knowledge was when a correct answer was given to all three questions. This minimum of 3/3 defining a good level of knowledge may seem rigorous. However, this minimum level justified the affordable difficulty of the questions.

### **Definition for scoring attitude**

Attitude was assessed using 6 criteria: attitude towards HBV infected persons, quality of hygiene (how often HCWs wash and/or disinfect their hands), frequency of glove use, frequency of needle stick injury, sexuality, and vaccination status of the HCW. Attitude was considered positive when a participant was able to correctly give at least 5 of the 6 expected answers. Having 5 of the 6 responses correct is deemed as having a positive attitude because HCWs are at the forefront of healthcare provision and should have appropriate attitude towards HBV for others in the population to emulate.

### **HBV serology**

HBsAg was tested using the MONOLISA HBsAg ULTRA ELISA kit from Bio-Rad (Marnes-La-Coquette-France), a fully multivalent assay showing high sensitivity in the detection of HBV mutants to determine those who were positive for HBsAg (6). ELISA assay was performed following the manufacturer's instructions.

### **Statistical analysis**

Data was analyzed using SPSS version 20.0 for Windows (SPSS, Chicago, Illinois, USA). Descriptive statistics for demographic characteristics, percentages for categorical variables, median and interquartile range (IQR) for continuous variables were used to analyse the findings of the study. Pearson's Chi square ( $p < 0.05$ ) was used to assess the significance among study variables while odd ratio was used to evaluate the strength of association between the various variables.

**Patient and Public Involvement Statement:** Patients and the public were not involved in designing the questionnaire, collecting and analysing data for this study.

## RESULTS

### Socio-demographic characteristics of study participants

In each health facility in the Bamenda Health District, over 70% of HCWs consented to participate in this study. Overall, a total of 398 HCWs across the Bamenda Health District participated in this study. Among these, 272 (68.3%) were women; the (16-25) year old age group was the most represented 167 (42.0%), and median age was 27.0 years (IQR, 23 - 32 years) at 95%CI (Table 1). Most participants were nurses (56.6% of workers and 55.7% of students), had worked for 2-4 years and lived in an urban setting (84.2%).

### Assessment of Knowledge

A total of 3 questions were used to assess knowledge of HCWs from different hospitals in this region on the route of HBV transmission (Table 2). 338 (84.9%) participants had heard of HBV. Most participants correctly identified sexual intercourse 313 (78.6%), mother-to-child transmission 292 (73.4 %) and contact with body fluid 324 (81.4 %) as routes of contamination with HBV. Among these, medical doctors were the most knowledgeable regarding HBV 13 (76.5%) while not up to 50% of sanitary workers had heard of HBV before this study (Table 3). Knowledge was significantly associated to the level of education and HCWs category ( $P<.001$ ). Overall, these HCWs had an unsatisfactory level of knowledge on the route of HBV transmission 269 (67.6%). Knowledge on the route of HBV transmission was higher among biomedical students 104 (69.8%) compared to the personnel 165 (66.3%).

### Attitude of HCWS TO HBV

Among the 398 HCWs, 270 (67.8%) HCWs had a positive attitude towards HBV infected persons (Table 4). Majority of HCWs practiced safe hygiene (washed their hands often and/or used a disinfectant) 317 (79.6%) and wore gloves often 310 (77.9%) while administering treatment. Needle stick injury was highest among sanitary workers (3 (6.8%)) while promiscuity (defined as having more than 10 sex partners in your life time, having sex with prostitute(s), and/or one night stands was highest among dentist

1  
2  
3 6(40.0). Only 93(23.4%) of HCWs reported receiving at least one dose of the vaccine,  
4 while 175 (44.0) HCWs showed an overall positive attitude towards HBV (Table ). There  
5 was a significant association between HCWs category and attitude towards HBV  
6 ( $P=.003$ ) (Table 3).  
7  
8  
9

### 10 11 12 **Prevalence of HBsAg among HCWs**

13 The prevalence of HBsAg positivity was 10.6% (Table 3). No statistically significant  
14 association was observed between HBsAg positivity and the different classes involved  
15 in this study (Table 3). Majority of those infected belonged to the (46-65) year age  
16 group 4 (16.7%), had worked for (5-9) years 7 (12.7%), had an SRN/SRM certificate 9  
17 (16.4), were nurses 28 (12.5) and lived in an urban setting 38 (11.3). No significant  
18 association was observed between knowledge on the route of HBV infection, attitude  
19 towards HBV and being positive for HBsAg (Table 4). However, the prevalence of HBsAg  
20 positivity was higher among those with adequate knowledge on the route of HBV  
21 transmission 26 (61.9%) and lower among those with a positive attitude towards HBV  
22 19 (45.2) (Table 4).  
23  
24  
25  
26  
27  
28  
29  
30  
31  
32

### 33 **DISCUSSION**

34 Exposure to blood-borne pathogens such as HBV infection remains a significant  
35 occupational hazard to HCWs, especially in countries where the prevalence of this  
36 infection is high. KAP studies among HCWs are necessary to evaluate and improve the  
37 awareness on the route of transmission, prevention and management of infectious  
38 diseases. This study was carried out to assess the knowledge, attitude and prevalence of  
39 HBV among HCWs in the Bamenda Health District, NWR, Cameroon.  
40  
41  
42  
43  
44

#### 45 ❖ **Assessment of Knowledge**

46 HCWs are at the fore front of health care provision and it is expected that they should  
47 know the routes of transmission of different infectious agents in order to protect their  
48 patients and themselves from nosocomial infections. Results of the current study  
49 revealed a significant association between HCWs category, level of education and  
50 knowledge on the route of HBV transmission. This is similar to what was obtained in  
51 Sierra Leone (11), Sudan (19) and Northeast Ethiopia (20). This may be justified by the  
52 fact that education trains individuals to acquire, evaluate and use information (21). This  
53  
54  
55  
56  
57  
58  
59  
60

1  
2  
3 may justify the unequal access to and exploitation of educational resources which  
4 increases with level of education (22) as well as role in the health setting.  
5  
6  
7

8  
9 Even though majority of HCWs in this setting had heard of HBV infection prior to this  
10 study 338 (84.9%), only 269 (67.6%) of them had good knowledge on the route of HBV  
11 transmission. This is similar to the 62.5% obtained in Northern Tanzania (9) and the  
12 58.7% obtained in the South West Region of Cameroon (23). However, this is higher  
13 than the 47.0% obtained in Yaoundé among HCWs (24), 52% obtained in North West,  
14 Ethiopia (10), the 29.9% obtained in Sierra Leone (11) and the 42.1% obtained in a  
15 rural population in the North West Region of Cameroon (25). According to Abongwa *et*  
16 *al.* (2016), the most probable reason for the low level of adequate knowledge on the  
17 route of HBV transmission could be inadequate health educative programs forcing the  
18 population to get information on HBV from friends and/or relatives (25). Getting  
19 information from friend, relatives and/or colleagues increases the probability of getting  
20 inappropriate information.  
21  
22  
23  
24  
25  
26  
27  
28  
29

30  
31 The level of current HBV infection was higher among those who had an adequate  
32 knowledge on the route of HBV transmission 26 (61.9%). This is contrary to what is  
33 anticipated (15) given that better knowledge on the route of disease transmission  
34 should help the individual take precautions against getting the infection in question.  
35 The disparity observed in this study can be explained by the same principle underlined  
36 above; inadequate health educative programs forcing the population to get information  
37 on HBV from friends, relatives and/or colleagues (22). This can thus justify the fact that  
38 most of the infected HCWs were chronic carriers who after their first diagnosis or  
39 exposure to HBV were directed to gastroenterologist for follow-up. Gastroenterologist  
40 also have the role of educating the patient on their disease.  
41  
42  
43  
44  
45  
46  
47  
48  
49

#### 50 ❖ **Assessment of Attitude of HCWs to HBV**

51  
52 There was a significant association between HCWs category and attitude towards HBV  
53 ( $P=0.003$ ) and even though 270 (67.8%) HCWs had a positive attitude (behaviour)  
54 towards HBV infected persons, only 175 (44.0%) HCWs showed an overall positive  
55 attitude towards HBV. The poor attitude of the majority of HCWs towards HBV in this  
56  
57  
58  
59  
60

1  
2  
3 study may be justified by the level of inadequate knowledge on the route of HBV  
4 transmission in this population (8,15).  
5  
6  
7

8 Prevalence of current HBV infection was lower among those with a positive attitude  
9 towards HBV 19 (45.2%). Developing a positive attitude towards a disease is generally  
10 associated with acquiring adequate knowledge on that disease as discussed above  
11 (8,15). This might justify the lower prevalence of current HBV infection among those  
12 with the positive attitude towards HBV.  
13  
14  
15  
16  
17

### 18 ❖ Prevalence of HBV among HCWs

19  
20 Various epidemiological and cross-sectional studies have reported marked variation in  
21 the prevalence of HBsAg among HCWs. Studies carried out among HCWs in Africa gave  
22 1.8 % in Libya (26), 2.9 % in Rwanda (27), 7.0 % in Tanzania (28) and 8.1 % in Uganda  
23 (29). This study revealed a relatively high burden of current HBV infection (10.6%)  
24 among HCWs in Cameroon. The high prevalence of HBV in this study population is  
25 similar to the HBV prevalence obtained in a similar study carried out in Yaoundé (24)  
26 but higher than the 8.7% obtained in the national survey among HCWs (30). The  
27 difference in prevalence of HBV could be because of the different diagnostic techniques  
28 used. The high prevalence of HBV infection obtained among HCWs in Cameroon may be  
29 a reflection of the prevalence of HBV infection in the general Cameroonian population  
30 which is estimated at 11.5% (4) or the lack of adequate knowledge on the route of HBV  
31 transmission among these HCWs (15).  
32  
33  
34  
35  
36  
37  
38  
39  
40  
41  
42  
43

44 The prevalence of HBV positivity was low in the (16-25) years age group and could be  
45 justified by the expanded immunization between 1990 to 2005, which led to a decrease  
46 in HBV infections in most regions particularly Central sub-Saharan Africa (31).  
47 Furthermore, most students were in the (16-25) year age group and thus had just  
48 started working in the health facilities.  
49  
50  
51  
52  
53

54 This was a cross-sectional study implying that participants were met only once. There  
55 was no follow-up to determine the outcome of the infection. Besides, data on knowledge  
56 and attitude were self-reported in this study and could be subject to individual bias.  
57 Finally, no serological test was performed to evaluate the level of vaccination coverage  
58  
59  
60

1  
2  
3 in this at-risk population. This implies that, the number of HCWs immune against HBV is  
4 lower than what is reported in this study. This negative attitude of HCWs, can be justify  
5 by the high cost of the vaccine, the lack of adequate supply and/or the simple fear of  
6 receiving the vaccine provoked by the many myths surrounding vaccination in some  
7 settings (32).  
8  
9  
10  
11  
12

## 13 **CONCLUSION**

14  
15 The level of knowledge on the route of HBV transmission observed in this study is fair.  
16 This lack of adequate knowledge might justify the relatively high prevalence of HBsAg  
17 positivity, the overall negative attitude towards HBV and the low rate of vaccination  
18 among HCWs in this area. Given that knowledge is usually the first step towards  
19 modification of a desirable behaviour, HBV campaigns should be organised to sensitize  
20 HCWs on this disease. The campaign can include improved mass media program such as  
21 broadcasting health talk intermittently online and/or within other television programs.  
22 Adequate sensitization will reduce the rate of stigma associated to the disease and  
23 probably the rate of new infections among HCWs.  
24  
25  
26  
27  
28  
29  
30  
31  
32

33 **Data Availability:** <https://doi.org/10.6084/m9.figshare.9641771>  
34  
35

## 36 **APPENDIX**

37  
38  
39 **Acknowledgement:** All HCWs who consented to participate in this study. Mr Ripa of  
40 CPC for helping out with part of the bench work. Dr. Akassong Dominique Dinga W. for  
41 helping with the purchase of material. RHB for permitting the blood sample to be stored  
42 in the RHB laboratory freezer during sample collection. The students of the CPC  
43 virology laboratory for going through this work.  
44  
45  
46  
47  
48  
49

50  
51 **Statement of Ethics:** Ethical clearance for the study was obtained from the National  
52 Ethics Committee of Cameroon (N°2017/02/871/CE/CNERSH/SP). Authorization to  
53 carry out research in the NWR was obtained from the regional delegation.  
54 Authorizations to access different hospitals were obtained from the directors or the in-  
55 charge of the hospitals. Authorization to access health centers was obtained from the  
56  
57  
58  
59  
60



1  
2  
3 District medical officer (DMO) and the chief of centers of the health facilities in this  
4 region. Written informed consent was obtained from each participant.  
5  
6  
7

8 **Authors' contribution:** AE and TC designed the study; AE and FV performed the  
9 experiments; AE drafted the manuscript; TC, NR, AL and KJR were involved in editing  
10 the manuscript; AE performed the statistical analysis. All authors read and approved  
11 the final manuscript.  
12  
13  
14

15  
16  
17 **Conflict of Interest:** The authors declare no conflict of interest.  
18  
19

20  
21 **Funding statement:** None.  
22  
23

24 **Questionnaire:** Available as supplementary file.  
25  
26  
27  
28  
29  
30  
31  
32  
33  
34  
35  
36  
37  
38  
39  
40  
41  
42  
43  
44  
45  
46  
47  
48  
49  
50  
51  
52  
53  
54  
55  
56  
57  
58  
59  
60

**REFERENCE**

1. Kathleen D. Hepatitis B: causes, symptoms and treatment. Medical News Today. 2018.
2. WHO. Updated fact sheet: Hepatitis B. In Geneva; 2018.
3. World Health Organization, Global Hepatitis Programme. Guidelines for the prevention, care, and treatment of persons with chronic hepatitis B infection [Internet]. Geneva: WHO; 2015 [cited 2018 Dec 11]. Available from: [http://apps.who.int/iris/bitstream/10665/154590/1/9789241549059\\_eng.pdf?ua=1&ua=1](http://apps.who.int/iris/bitstream/10665/154590/1/9789241549059_eng.pdf?ua=1&ua=1)
4. Njouom R, Tejiokem M, Texier G, Fontanet A. O-02: Prevalence of hepatitis B, hepatitis C and hepatitis D virus infections in Cameroon: results from a national population based survey (The ANRS 12289 project). J Viral Hepat [Internet]. 2015 [cited 2018 Dec 11];22(S2):1-2. Available from: [https://onlinelibrary.wiley.com/doi/abs/10.1111/jvh.01\\_12424](https://onlinelibrary.wiley.com/doi/abs/10.1111/jvh.01_12424)
5. Tarantola A, Abiteboul D, Rachline A. Infection risks following accidental exposure to blood or body fluids in health care workers: A review of pathogens transmitted in published cases. American Journal of Infection Control. 2006 Aug;34(6):367-75.
6. Dement J, Epling C, Ostbye T, Pompeii L, Hunt D. Blood and body fluid exposure risks among health care workers: results from the Duke Health and Safety Surveillance System. American Journal of Industrial Medicine. 2004 Dec;46(6):637-48.
7. WHO. Health Care Worker Safety. In Geneva: WHO; 2003.
8. Reis C, Heisler M, Amowitz L, Moreland S, Mafeni J, Anyamele C, et al. Discriminatory attitudes and practices by health workers toward patients with HIV/AIDS in Nigeria. PLOS Medicine. 2005 Jul 19;2(8):e246.
9. Shao E, Mboya I, Gunda D, Ruhangisa F, Temu E, Nkwama M, et al. Seroprevalence of hepatitis B virus infection and associated factors among healthcare workers in northern Tanzania. BMC Infectious Disease. 2018 Sep 21;18:474.

10. Abeje G, Azage M. Hepatitis B vaccine knowledge and vaccination status among health care workers of Bahir Dar City Administration, Northwest Ethiopia: a cross sectional study. *BMC Infect Dis* [Internet]. 2015 Dec [cited 2019 Jan 8];15(1). Available from: <http://bmcinfectdis.biomedcentral.com/articles/10.1186/s12879-015-0756-8>
11. Chinese Military Medical Experts Group in Sierra Leone, Qin Y-L, Li B, Zhou Y-S, Zhang X, Li L, et al. Prevalence and associated knowledge of hepatitis B infection among healthcare workers in Freetown, Sierra Leone. *BMC Infect Dis* [Internet]. 2018 Dec [cited 2019 Aug 17];18(1). Available from: <https://bmcinfectdis.biomedcentral.com/articles/10.1186/s12879-018-3235-1>
12. Ahmed T, Siham A, Asma A, Mawahib E, Zeinab S, Abdelgadir A. Knowledge, Attitude and Practice of Health Care Workers Regarding Transmission and Prevention of Hepatitis B Virus Infection, White Nile State, Sudan, 2013. *Am J Health Res* [Internet]. 2016 [cited 2019 Jan 8];4(2):18. Available from: <http://www.sciencepublishinggroup.com/journal/paperinfo?journalid=656&doi=10.11648/j.ajhr.20160402.11>
13. Smith SM. Determining-Sample-Size. *qualtrics*. 2013;7.
14. Tandji TE, Cho Y, Akam AJ-C, Afoh CO, Ryu SH, Choi MS, et al. Cameroon public health sector: shortage and inequalities in geographic distribution of health personnel. *Int J Equity Health* [Internet]. 2015 Dec [cited 2019 Feb 26];14(1). Available from: <http://www.equityhealthj.com/content/14/1/43>
15. ul Haq N, Hassali MA, Shafie AA, Saleem F, Farooqui M, Aljadhey H. A cross sectional assessment of knowledge, attitude and practice towards Hepatitis B among healthy population of Quetta, Pakistan. *BMC Public Health* [Internet]. 2012 Dec [cited 2019 Mar 22];12(1). Available from: <https://bmcpublikealth.biomedcentral.com/articles/10.1186/1471-2458-12-692>
16. Al-Thaqafy MS, Balkhy HH, Memish Z, Makhdom YM, Ibrahim A, Al-Amri A, et al. Improvement of the low knowledge, attitude and practice of hepatitis B virus infection among Saudi national guard personnel after educational intervention. *BMC*

- 1  
2  
3 Res Notes [Internet]. 2012 [cited 2019 Mar 22];5(1):597. Available from:  
4 <http://bmresnotes.biomedcentral.com/articles/10.1186/1756-0500-5-597>  
5  
6  
7  
8 17. Setia S, Gambhir R, Kapoor V, Jindal G, Garg S. Attitudes and Awareness Regarding  
9 Hepatitis B and Hepatitis C Amongst Health-care Workers of a Tertiary Hospital in  
10 India. *Ann Med Health Sci Res*. 2013;3(4):551–8.  
11  
12  
13  
14 18. Jain S, Dubey S, Jain S. Designing and validation of questionnaire. *Int Dent Med J Adv*  
15 *Res - Vol 2015* [Internet]. 2016 [cited 2019 Nov 11];2(1):1` – 3. Available from:  
16 [http://idjar.net/eJournals/ShowText.aspx?ID=39&Type=FREE&TYP=TOP&IN=\\_eJo](http://idjar.net/eJournals/ShowText.aspx?ID=39&Type=FREE&TYP=TOP&IN=_eJo)  
17 [urnals/images/JPLOGO.gif&IID=2&Value=1&isPDF=YES](http://idjar.net/eJournals/ShowText.aspx?ID=39&Type=FREE&TYP=TOP&IN=_eJournals/images/JPLOGO.gif&IID=2&Value=1&isPDF=YES)  
18  
19  
20  
21  
22 19. Almustafa S, Almegdad S, Tariq A, Mutaz T, Awab M, Moneeb H, et al. Knowledge,  
23 attitude and practice of Hepatitis B among healthcare workers in relation to their  
24 vaccination status in Khartoum, Sudan, 2015: A cross-sectional study. *Sudan J Med*  
25 *Sci*. 2018 Mar 14;13(1):22–32.  
26  
27  
28  
29  
30 20. Demsiss W, Seid A, Fiseha T. Hepatitis B and C: Seroprevalence, knowledge, practice  
31 and associated factors among medicine and health science students in Northeast  
32 Ethiopia. *Chemin I*, editor. *PLOS ONE* [Internet]. 2018 May 15 [cited 2019 Aug  
33 17];13(5):e0196539. Available from:  
34 <http://dx.plos.org/10.1371/journal.pone.0196539>  
35  
36  
37  
38  
39  
40 21. Mirowsky J, Ross CE. Education, learned effectiveness and health <sup>1</sup>. *Lond Rev Educ*  
41 [Internet]. 2005 Jan [cited 2019 Jan 23];3(3):205–20. Available from:  
42 <http://www.ingentaconnect.com/content/ioep/clre/2005/00000003/00000003/a>  
43 [rt00003](http://www.ingentaconnect.com/content/ioep/clre/2005/00000003/00000003/art00003)  
44  
45  
46  
47  
48 22. Zimmerma E, Woolf S, Haley A. Understanding the Relationship Between Education  
49 and Health: A Review of the Evidence and an Examination of Community  
50 Perspectives. Agency for Healthcare Research and Quality; 2015.  
51  
52  
53  
54 23. Ngekeng S, Chichom-Mefire A, Nde P, Nsagha D, Nkuigie A, Tiogouo K, et al.  
55 Hepatitis B Prevalence, Knowledge and Occupational Factors among Health Care  
56 Workers in Fako Division, South West Region Cameroon. *Microbiology Research*  
57 *Journal International*. 2018 Apr 9;23(4):1–9.  
58  
59  
60

- 1  
2  
3  
4  
5  
6  
7  
8  
9  
10  
11  
12  
13  
14  
15  
16  
17  
18  
19  
20  
21  
22  
23  
24  
25  
26  
27  
28  
29  
30  
31  
32  
33  
34  
35  
36  
37  
38  
39  
40  
41  
42  
43  
44  
45  
46  
47  
48  
49  
50  
51  
52  
53  
54  
55  
56  
57  
58  
59  
60
24. Tatsilong HOP, Noubiap JJN, Nansseu JRN, Aminde LN, Bigna JJR, Ndze VN, et al. Hepatitis B infection awareness, vaccine perceptions and uptake, and serological profile of a group of health care workers in Yaoundé, Cameroon. *BMC Public Health* [Internet]. 2016 Dec [cited 2018 Dec 11];16(1). Available from: <http://bmcpublikealth.biomedcentral.com/articles/10.1186/s12889-016-3388-z>
  25. Abongwa LE, Sunjo NS, Afah NG. Assessment of Knowledge, Attitude and Practice towards Hepatitis B among two rural communities of the Anglophone regions in Cameroon. *IRA-Int J Appl Sci* ISSN 2455-4499 [Internet]. 2016 Oct 3 [cited 2019 Mar 22];4(3):490. Available from: <http://research-advances.org/index.php/IRAJAS/article/view/496>
  26. Elzouki A-N, Elgamay SM, Zorgani A, Elahmer O. Hepatitis B and C status among health care workers in the five main hospitals in eastern Libya. *J Infect Public Health* [Internet]. 2014 Nov [cited 2019 Jan 12];7(6):534–41. Available from: <https://linkinghub.elsevier.com/retrieve/pii/S1876034114001063>
  27. Kateera F, Walker T, Mutesa L, Mutabazi V, Musabeyesu E, Mukabatsinda C, et al. Hepatitis B and C seroprevalence among health care workers in a tertiary hospital in Rwanda. *Trans R Soc Trop Med Hyg*. 2015 Jan 30;109(3):203–208.
  28. Mueller A, Stoetter L, Kalluvya S, Stich A, Majinge C, Weissbrich B, et al. Prevalence of hepatitis B virus infection among health care workers in a tertiary hospital in Tanzania. *BMC Infect Dis* [Internet]. 2015 [cited 2018 Dec 11];15(1). Available from: <http://bmcinfectdis.biomedcentral.com/articles/10.1186/s12879-015-1129-z>
  29. Ziraba A, Bwogi J, Namale A, Wainaina C, Mayanja-Kizza H. Sero-prevalence and risk factors for hepatitis B virus infection among health care workers in a tertiary hospital in Uganda. *BMC Infectious Disease*. 2010 Jun 29;10:191.
  30. Ndongo CB, Eteki L, Siedner M, Mbaye R, Chen J, Ntone R, et al. Prevalence and vaccination coverage of Hepatitis B among healthcare workers in Cameroon: A national seroprevalence survey. *J Viral Hepat* [Internet]. 2018 Dec 1 [cited 2018 Dec 11];25(12):1582–7. Available from: <https://onlinelibrary.wiley.com/doi/abs/10.1111/jvh.12974>

- 1  
2  
3  
4  
5  
6  
7  
8  
9  
10  
11  
12  
13  
14  
15  
16  
17  
18  
19  
20  
21  
22  
23  
24  
25  
26  
27  
28  
29  
30  
31  
32  
33  
34  
35  
36  
37  
38  
39  
40  
41  
42  
43  
44  
45  
46  
47  
48  
49  
50  
51  
52  
53  
54  
55  
56  
57  
58  
59  
60
31. Ott JJ, Stevens GA, Groeger J, Wiersma ST. Global epidemiology of hepatitis B virus infection: New estimates of age-specific HBsAg seroprevalence and endemicity. *Vaccine* [Internet]. 2012 Mar [cited 2018 Dec 11];30(12):2212–9. Available from: <https://linkinghub.elsevier.com/retrieve/pii/S0264410X11020779>
32. World Health Organization. Myths and facts about immunization,. WHO Regional Office for Europe; 2015.

**Table 1: Baseline characteristics in the studied population**

| Variables                         |                             | Frequency (398)    | Percentage |
|-----------------------------------|-----------------------------|--------------------|------------|
| <b>Sex</b>                        | Male                        | 126                | 31.7       |
|                                   | Female                      | 272                | 68.3       |
| <b>Age Intervals</b>              | 16-25                       | 167                | 42.0       |
|                                   | 26-35                       | 157                | 39.4       |
|                                   | 36-45                       | 50                 | 12.6       |
|                                   | 46-65                       | 24                 | 6.0        |
| <b>Level of Education</b>         | Secondary and below         | 39                 | 9.8        |
|                                   | Diploma                     | 59                 | 14.8       |
|                                   | SRN/SRM                     | 55                 | 13.8       |
|                                   | HND                         | 103                | 25.9       |
|                                   | BSc                         | 118                | 29.6       |
|                                   | Post Graduate               | 24                 | 6.0        |
| <b>Duration In the Occupation</b> | ≤ 1 year                    | 72                 | 18.1       |
|                                   | 2 – 4 years                 | 218                | 54.8       |
|                                   | 5 – 9 years                 | 55                 | 13.8       |
|                                   | ≥ 10 year                   | 53                 | 13.3       |
| <b>HCWs category</b>              | Nurses                      | 224                | 56.3       |
|                                   | Lab Technicians             | 90                 | 22.6       |
|                                   | Medical Doctors             | 17                 | 4.3        |
|                                   | Dentist                     | 15                 | 3.8        |
|                                   | Pharmacist                  | 8                  | 2.0        |
|                                   | Sanitary Workers            | 44                 | 11.1       |
|                                   | <b>Role In the Hospital</b> | Biomedical Student | 149        |
|                                   | Biomedical Personnel        | 249                | 62.6       |
| <b>Residence</b>                  | Urban                       | 335                | 84.2       |
|                                   | Semi-Urban                  | 18                 | 4.5        |
|                                   | Rural                       | 45                 | 11.3       |

Data are n and %.

**Table 2: Knowledge on route of HBV transmission**

| Questions    | Correct Response n (%) |                        |                        |                |                  |                         |               |            |
|--------------|------------------------|------------------------|------------------------|----------------|------------------|-------------------------|---------------|------------|
|              | Nurses (n=224)         | Medical Doctors (n=17) | Lab Technicians (n=90) | Dentist (n=15) | Pharmacist (n=8) | Sanitary Workers (n=44) | Total (n=398) |            |
| Heard of HBV | Yes                    | 199 (88.8)             | 16 (94.1)              | 86 (95.6)      | 12 (80.0)        | 5 (62.5)                | 20 (45.5)     | 338 (84.9) |
|              | No                     | 25 (11.2)              | 1 (5.9)                | 4 (4.4)        | 3 (20.0)         | 3 (37.5)                | 24 (54.5)     | 60 (15.1)  |

|                          |     |            |           |           |           |          |           |            |
|--------------------------|-----|------------|-----------|-----------|-----------|----------|-----------|------------|
| Sexually transmitted     | Yes | 183 (81.7) | 16 (94.1) | 82 (91.1) | 11 (73.3) | 3 (37.5) | 18 (40.9) | 313 (78.6) |
|                          | No  | 41 (18.3)  | 1 (5.9)   | 8 (8.9)   | 4 (26.7)  | 5 (62.5) | 26 (59.1) | 85 (21.4)  |
| Vertical transmission    | Yes | 179 (79.9) | 14 (82.4) | 69 (76.7) | 9 (60.0)  | 5 (62.5) | 16 (36.4) | 292 (73.4) |
|                          | No  | 45 (20.1)  | 3 (17.6)  | 21 (23.3) | 6 (40.0)  | 3 (37.5) | 28 (63.6) | 106 (26.6) |
| Contact with body fluids | Yes | 191 (85.3) | 15 (88.2) | 84 (93.3) | 11 (73.3) | 5 (62.5) | 18 (40.9) | 324 (81.4) |
|                          | No  | 33 (14.7)  | 2 (11.8)  | 6 (6.7)   | 4 (26.7)  | 3 (37.5) | 26 (59.1) | 74 (18.6)  |
| Knowledge on HBV         | Yes | 162 (72.3) | 13 (76.5) | 68 (75.6) | 9 (60.0)  | 3 (37.5) | 14 (31.8) | 269 (67.6) |
|                          | No  | 62 (27.7)  | 4 (23.5)  | 22 (24.4) | 6 (40.0)  | 5 (62.5) | 30 (62.2) | 129 (32.4) |

Data are n (%).

**Table 3: Prevalence of HBV infection among HCWs**

| Characteristic             |                             | Knowledge on route of transmission |         | Positive attitude |         | HBsAg Positivity |         |
|----------------------------|-----------------------------|------------------------------------|---------|-------------------|---------|------------------|---------|
|                            |                             | n(%)                               | p-value | n(%)              | p-value | n(%)             | p-value |
| Sex                        | Male (n=126)                | 88 (69.8)                          | 0.513   | 61 (48.4)         | 0.224   | 9 (7.1)          | 0.132   |
|                            | Female (n=272)              | 181 (66.5)                         |         | 114 (41.9)        |         | 33 (12.1)        |         |
| Age Group                  | 16-25 (n=167)               | 118 (70.7)                         | 0.169   | 74 (44.3)         | 0.456   | 14 (8.4)         | 0.532   |
|                            | 26-35 (n=157)               | 109 (69.4)                         |         | 72 (45.9)         |         | 19 (12.2)        |         |
|                            | 36-45 (n=50)                | 29 (58.0)                          |         | 17 (34.0)         |         | 5 (10.0)         |         |
|                            | 46-65 (n=24)                | 13 (54.2)                          |         | 12 (50.0)         |         | 4 (16.7)         |         |
| Level of education         | ≤ Secondary (n=39)          | 11 (28.2)                          | < 0.001 | 14 (35.9)         | 0.186   | 3 (7.7)          | 0.771   |
|                            | Diploma (n=59)              | 36 (61.0)                          |         | 23 (39.0)         |         | 6 (10.2)         |         |
|                            | SRN/SRM (n=55)              | 36 (65.5)                          |         | 22 (40.0)         |         | 9 (16.4)         |         |
|                            | HND (n=103)                 | 79 (76.7)                          |         | 42 (40.8)         |         | 10 (9.7)         |         |
|                            | BSc (n=118)                 | 88 (74.6)                          |         | 64 (54.2)         |         | 12 (10.2)        |         |
|                            | Post Graduate (n=24)        | 19 (79.2)                          |         | 10 (41.7)         |         | 2 (8.3)          |         |
| Duration in the occupation | ≤ 1 year (n=72)             | 45 (62.5)                          | 0.649   | 30 (41.7)         | 0.217   | 7 (9.7)          | 0.601   |
|                            | 2-4 years (n=218)           | 157 (72.0)                         |         | 101 (46.3)        |         | 23 (10.6)        |         |
|                            | 5-9 years (n=55)            | 34 (61.8)                          |         | 21 (38.2)         |         | 7 (12.7)         |         |
|                            | ≥ 10 year (n=53)            | 33 (62.3)                          |         | 23 (43.4)         |         | 5 (9.4)          |         |
| HCWs category              | Nurses (n=224)              | 162 (72.3)                         | <0.001  | 87 (38.8)         | 0.003   | 28 (12.5)        | 0.640   |
|                            | Lab Tech (n=90)             | 68 (75.6)                          |         | 54 (60.0)         |         | 8 (8.9)          |         |
|                            | Medical doctors (n=17)      | 13 (76.5)                          |         | 9 (52.9)          |         | 1 (5.9)          |         |
|                            | Dentist (N=15)              | 9 (60.0)                           |         | 9 (60.0)          |         | 2 (13.3)         |         |
|                            | Pharmacist (N=8)            | 3 (37.5)                           |         | 2 (25.0)          |         | 1 (12.5)         |         |
|                            | Sanitary workers (N=44)     | 14 (31.8)                          |         | 14 (31.8)         |         | 2 (4.5)          |         |
|                            | Biomedical students (N=149) | 104 (69.8)                         | 0.466   | 65 (43.6)         | 0.914   | 13 (8.7)         | 0.359   |



|           |                              |            |       |            |       |           |       |
|-----------|------------------------------|------------|-------|------------|-------|-----------|-------|
|           | Biomedical personnel (N=249) | 165 (66.3) |       | 110 (44.2) |       | 29 (11.6) |       |
| Residence | Urban (N=335)                | 229 (68.4) | 0.523 | 152 (45.4) | 0.408 | 38 (11.3) | 0.492 |
|           | Semi-urban (N=18)            | 10 (55.6)  |       | 6 (33.3)   |       | 1 (5.6)   |       |
|           | Rural (N=45)                 | 30 (66.7)  |       | 17 (37.8)  |       | 3 (6.7)   |       |

Data are n (%); p-value<.05 is considered significant.

**Table 4: Attitude of HCWs towards HBV**

| Attitudes                            |          | Health Care Worker n (%) |               |                        |                   |                     |                                |                  |
|--------------------------------------|----------|--------------------------|---------------|------------------------|-------------------|---------------------|--------------------------------|------------------|
|                                      |          | Nurses<br>(n=224)        | MDs<br>(n=17) | Lab<br>Techs<br>(n=90) | Dentist<br>(n=15) | Pharmacist<br>(n=8) | Auxiliary<br>workers<br>(n=44) | Total<br>(n=398) |
| Attitude towards<br>infected persons | Good     | 137 (61.2)               | 13 (76.5)     | 70 (77.8)              | 13 (86.7)         | 5 (62.7)            | 32 (72.7)                      | 270 (67.8)       |
|                                      | Bad      | 87 (38.8)                | 4 (23.5)      | 20 (22.2)              | 2 (13.3)          | 3 (37.5)            | 12 (27.3)                      | 128 (32.2)       |
| Practice safe<br>hygiene             | Yes      | 193 (86.2)               | 14 (82.4)     | 63 (70.0)              | 14 (93.3)         | 6 (75.0)            | 27 (61.4)                      | 317 (79.6)       |
|                                      | No       | 31 (13.8)                | 3 (17.6)      | 27 (30.0)              | 1 (6.7)           | 2 (25.0)            | 17 (38.6)                      | 81 (20.4)        |
| Wears gloves<br>often                | Yes      | 177 (79.0)               | 15 (88.2)     | 82 (91.1)              | 10 (66.7)         | 4 (50.0)            | 22 (50.0)                      | 310 (77.9)       |
|                                      | No       | 47 (21.0)                | 2 (11.8)      | 8 (8.9)                | 5 (33.3)          | 4 (50.0)            | 22 (50.0)                      | 88 (22.1)        |
| Frequency of<br>needle stick injury  | Often    | 10 (4.5)                 | 0 (0.0)       | 1 (1.1)                | 0 (0.0)           | 0 (0.0)             | 3 (6.8)                        | 14 (3.5)         |
|                                      | Rarely   | 214 (95.5)               | 17 (100.0)    | 89 (98.9)              | 15 (100.0)        | 8 (100.0)           | 41 (93.2)                      | 384 (96.5)       |
| Received 1 dose of<br>vaccine        | Yes      | 43 (19.2)                | 4 (23.5)      | 28 (31.1)              | 10 (66.7)         | 3 (37.5)            | 5 (11.4)                       | 93 (23.4)        |
|                                      | No       | 181 (80.8)               | 13 (76.5)     | 62 (68.9)              | 5 (33.3)          | 5 (62.5)            | 39 (88.6)                      | 305 (76.6)       |
| Sexually<br>promiscuous              | Yes      | 46 (20.5)                | 4 (23.5)      | 10 (11.1)              | 6 (40.0)          | 2 (25.0)            | 16 (36.4)                      | 84 (21.1)        |
|                                      | No       | 178 (79.5)               | 13 (76.5)     | 80 (88.9)              | 9 (60.0)          | 6 (75.0)            | 28 (63.6)                      | 314 (78.9)       |
| General Attitude                     | Positive | 87 (38.8)                | 9 (52.9)      | 54 (60.0)              | 9 (60.0)          | 2 (25.0)            | 14 (31.8)                      | 175 (44.0)       |
|                                      | Negative | 137 (61.2)               | 8 (47.1)      | 36 (40.0)              | 6 (40.0)          | 6 (75.0)            | 30 (68.2)                      | 223 (56.0)       |

Data are n (%).

**Table 4: Association between knowledge, attitude and prevalence of HBsAg**

| Characteristics  |          | Reactivity to HBsAg |      |         | Unadjusted Risk of HBsAg |               |
|------------------|----------|---------------------|------|---------|--------------------------|---------------|
|                  |          | No                  | %    | p-value | OR                       | 95% CI        |
| Knowledge (n=42) | Adequate | 26                  | 61.9 | 0.405   | 1.323                    | 0.683 - 2.564 |
|                  | Poor     | 16                  | 38.1 |         |                          |               |
| Attitude (n=270) | Positive | 19                  | 45.2 | 0.861   | 0.994                    | 0.497 - 1.795 |
|                  | Negative | 23                  | 54.8 |         |                          |               |

p-value<.05 is considered to be significant.

1  
2  
3  
4  
5  
6  
7  
8  
9  
10  
11  
12  
13  
14  
15  
16  
17  
18  
19  
20  
21  
22  
23  
24  
25  
26  
27  
28  
29  
30  
31  
32  
33  
34  
35  
36  
37  
38  
39  
40  
41  
42  
43  
44  
45  
46  
47  
48  
49  
50  
51  
52  
53  
54  
55  
56  
57  
58  
59  
60

For peer review only

## Questionnaire

Date: \_\_\_\_\_ Tel: \_\_\_\_\_ S/N \_\_\_\_\_

Instruction: Tick where necessary and fill all blank spaces

### A- Demographic Data

- 1) Age: \_\_\_\_\_ Sex: Male  Female
- 2) Where do you live? \_\_\_\_\_
- 3) Is it an urban, semi-urban or a rural setting: \_\_\_\_\_
- 4) Religion: \_\_\_\_\_ Denomination (If any): \_\_\_\_\_
- 5) Profession (specify) \_\_\_\_\_
- 6) Duration in the occupation: \_\_\_\_\_
- 7) Level of education: Primary  O'level  A'level  HND  BSc  MSc  PhD   
Diploma

### B- Sexuality

- 8) Age of first sexual intercourse \_\_\_\_\_
- 9) Have you ever had sex with someone you did not know (one-night stand)? Yes  No
- 10) Have you ever had sex with a prostitute? Yes  No
- 11) Have you had more than 10 sex partners in your lifetime? Yes  No

### C- Knowledge on HBV

- 12) Have you heard of hepatitis B viral infection before now? Yes  No
- 13) Can HBV be transmitted sexually? Yes  No
- 14) Can HBV be transmitted through kissing? Yes  No
- 15) Can HBV be transmitted from a mother to her unborn child? Yes  No
- 16) Can HBV be transmitted through contact with body fluid like blood? Yes  No

## Questionnaire

### D- Exposure to nosocomial infection

- 17) How often do you wear gloves when administering treatment? Rarely  Often
- 18) Have you ever pricked yourself while administering treatment? Yes  No
- 19) If yes, how often? Rarely  Often
- 20) What is your attitude towards HBV positive patients? Same as towards other patients   
Discreet and scared
- 21) How often do you wash your hand? After every patient  If I don't put on gloves   
When I remember
- 22) How often do you use a disinfectant? Rarely  Often

### E- Medical History

- 23) Have you been vaccinated against HBV? Yes  No
- 24) If yes, did you take the complete dose? Yes  No
- 25) How many times have you been tested for HBV? \_\_\_\_\_
- 26) Have you ever been tested positive for HBV? \_\_\_\_\_
- 27) Month and year \_\_\_\_\_

### F- Serology Result (Please do not fill)

HBsAg: \_\_\_\_\_

Thanks for your cooperation

## STROBE (Strengthening The Reporting of OBServational Studies in Epidemiology) Checklist

A checklist of items that should be included in reports of observational studies. You must report the page number in your manuscript where you consider each of the items listed in this checklist. If you have not included this information, either revise your manuscript accordingly before submitting or note N/A.

**Note:** An Explanation and Elaboration article discusses each checklist item and gives methodological background and published examples of transparent reporting. The STROBE checklist is best used in conjunction with this article (freely available on the Web sites of PLoS Medicine at <http://www.plosmedicine.org/>, Annals of Internal Medicine at <http://www.annals.org/>, and Epidemiology at <http://www.epidem.com/>). Information on the STROBE Initiative is available at [www.strobe-statement.org](http://www.strobe-statement.org).

| Section and Item     | Item No. | Recommendation                                                                                                                                                                                                                                                                                                                                                                                                                                                                 | Reported on Page No. |
|----------------------|----------|--------------------------------------------------------------------------------------------------------------------------------------------------------------------------------------------------------------------------------------------------------------------------------------------------------------------------------------------------------------------------------------------------------------------------------------------------------------------------------|----------------------|
| Title and Abstract   | 1        | (a) Indicate the study's design with a commonly used term in the title or the abstract                                                                                                                                                                                                                                                                                                                                                                                         |                      |
|                      |          | (b) Provide in the abstract an informative and balanced summary of what was done and what was found                                                                                                                                                                                                                                                                                                                                                                            |                      |
| <b>Introduction</b>  |          |                                                                                                                                                                                                                                                                                                                                                                                                                                                                                |                      |
| Background/Rationale | 2        | Explain the scientific background and rationale for the investigation being reported                                                                                                                                                                                                                                                                                                                                                                                           |                      |
| Objectives           | 3        | State specific objectives, including any prespecified hypotheses                                                                                                                                                                                                                                                                                                                                                                                                               |                      |
| <b>Methods</b>       |          |                                                                                                                                                                                                                                                                                                                                                                                                                                                                                |                      |
| Study Design         | 4        | Present key elements of study design early in the paper                                                                                                                                                                                                                                                                                                                                                                                                                        |                      |
| Setting              | 5        | Describe the setting, locations, and relevant dates, including periods of recruitment, exposure, follow-up, and data collection                                                                                                                                                                                                                                                                                                                                                |                      |
| Participants         | 6        | (a) <i>Cohort study</i> —Give the eligibility criteria, and the sources and methods of selection of participants. Describe methods of follow-up<br><br><i>Case-control study</i> —Give the eligibility criteria, and the sources and methods of case ascertainment and control selection. Give the rationale for the choice of cases and controls<br><br><i>Cross-sectional study</i> —Give the eligibility criteria, and the sources and methods of selection of participants |                      |
|                      |          | (b) <i>Cohort study</i> —For matched studies, give matching criteria and number of exposed and unexposed<br><br><i>Case-control study</i> —For matched studies, give matching criteria and the number of controls per case                                                                                                                                                                                                                                                     |                      |
| Variables            | 7        | Clearly define all outcomes, exposures, predictors, potential confounders, and effect modifiers. Give diagnostic criteria, if applicable                                                                                                                                                                                                                                                                                                                                       |                      |

| Section and Item             | Item No. | Recommendation                                                                                                                                                                                                                                                                                            | Reported on Page No. |
|------------------------------|----------|-----------------------------------------------------------------------------------------------------------------------------------------------------------------------------------------------------------------------------------------------------------------------------------------------------------|----------------------|
| Data Sources/<br>Measurement | 8*       | For each variable of interest, give sources of data and details of methods of assessment (measurement). Describe comparability of assessment methods if there is more than one group                                                                                                                      |                      |
| Bias                         | 9        | Describe any efforts to address potential sources of bias                                                                                                                                                                                                                                                 |                      |
| Study Size                   | 10       | Explain how the study size was arrived at                                                                                                                                                                                                                                                                 |                      |
| Quantitative Variables       | 11       | Explain how quantitative variables were handled in the analyses. If applicable, describe which groupings were chosen and why                                                                                                                                                                              |                      |
| Statistical Methods          | 12       | (a) Describe all statistical methods, including those used to control for confounding                                                                                                                                                                                                                     |                      |
|                              |          | (b) Describe any methods used to examine subgroups and interactions                                                                                                                                                                                                                                       |                      |
|                              |          | (c) Explain how missing data were addressed                                                                                                                                                                                                                                                               |                      |
|                              |          | (d) <i>Cohort study</i> —If applicable, explain how loss to follow-up was addressed<br><i>Case-control study</i> —If applicable, explain how matching of cases and controls was addressed<br><i>Cross-sectional study</i> —If applicable, describe analytical methods taking account of sampling strategy |                      |
|                              |          | (e) Describe any sensitivity analyses                                                                                                                                                                                                                                                                     |                      |
| <b>Results</b>               |          |                                                                                                                                                                                                                                                                                                           |                      |
| Participants                 | 13*      | (a) Report numbers of individuals at each stage of study—eg numbers potentially eligible, examined for eligibility, confirmed eligible, included in the study, completing follow-up, and analysed                                                                                                         |                      |
|                              |          | (b) Give reasons for non-participation at each stage                                                                                                                                                                                                                                                      |                      |
|                              |          | (c) Consider use of a flow diagram                                                                                                                                                                                                                                                                        |                      |
| Descriptive Data             | 14*      | (a) Give characteristics of study participants (eg demographic, clinical, social) and information on exposures and potential confounders                                                                                                                                                                  |                      |
|                              |          | (b) Indicate number of participants with missing data for each variable of interest                                                                                                                                                                                                                       |                      |
|                              |          | (c) <i>Cohort study</i> —Summarise follow-up time (eg, average and total amount)                                                                                                                                                                                                                          |                      |
| Outcome Data                 | 15*      | <i>Cohort study</i> —Report numbers of outcome events or summary measures over time                                                                                                                                                                                                                       |                      |
|                              |          | <i>Case-control study</i> —Report numbers in each exposure category, or summary measures of exposure                                                                                                                                                                                                      |                      |
|                              |          | <i>Cross-sectional study</i> —Report numbers of outcome events or summary measures                                                                                                                                                                                                                        |                      |

| Section and Item         | Item No. | Recommendation                                                                                                                                                                                               | Reported on Page No. |
|--------------------------|----------|--------------------------------------------------------------------------------------------------------------------------------------------------------------------------------------------------------------|----------------------|
| Main Results             | 16       | (a) Give unadjusted estimates and, if applicable, confounder-adjusted estimates and their precision (eg, 95% confidence interval). Make clear which confounders were adjusted for and why they were included |                      |
|                          |          | (b) Report category boundaries when continuous variables were categorized                                                                                                                                    |                      |
|                          |          | (c) If relevant, consider translating estimates of relative risk into absolute risk for a meaningful time period                                                                                             |                      |
| Other Analyses           | 17       | Report other analyses done—eg analyses of subgroups and interactions, and sensitivity analyses                                                                                                               |                      |
| <b>Discussion</b>        |          |                                                                                                                                                                                                              |                      |
| Key Results              | 18       | Summarise key results with reference to study objectives                                                                                                                                                     |                      |
| Limitations              | 19       | Discuss limitations of the study, taking into account sources of potential bias or imprecision. Discuss both direction and magnitude of any potential bias                                                   |                      |
| Interpretation           | 20       | Give a cautious overall interpretation of results considering objectives, limitations, multiplicity of analyses, results from similar studies, and other relevant evidence                                   |                      |
| Generalisability         | 21       | Discuss the generalisability (external validity) of the study results                                                                                                                                        |                      |
| <b>Other Information</b> |          |                                                                                                                                                                                                              |                      |
| Funding                  | 22       | Give the source of funding and the role of the funders for the present study and, if applicable, for the original study on which the present article is based                                                |                      |

\*Give information separately for cases and controls in case-control studies and, if applicable, for exposed and unexposed groups in cohort and cross-sectional studies.

**Once you have completed this checklist, please save a copy and upload it as part of your submission. DO NOT include this checklist as part of the main manuscript document. It must be uploaded as a separate file.**
