# Supplementary material for: Knowledge, attitude and prevalence of hepatitis B virus among healthcare workers: a cross-sectional, hospital-based study in Bamenda Health District, NWR, Cameroon
Source: PubMed Central journal article supplement — BMJ Open. 2020 Mar 18;10(3):e031075. doi: 10.1136/bmjopen-2019-031075 (PMC7150593; doi:10.1136/bmjopen-2019-031075), 2020-03-18
Supplement: bmjopen-2019-031075supp001.pdf [file bmjopen-2019-031075supp001.pdf]

## Questionnaire

Date: \_\_\_\_\_ Tel: \_\_\_\_\_ S/N \_\_\_\_\_

Instruction: Tick where necessary and fill all blank spaces

### A- Demographic Data

- 1) Age: \_\_\_\_\_ Sex: Male  Female
- 2) Where do you live? \_\_\_\_\_
- 3) Is it an urban, semi-urban or a rural setting: \_\_\_\_\_
- 4) Religion: \_\_\_\_\_ Denomination (If any): \_\_\_\_\_
- 5) Profession (specify) \_\_\_\_\_
- 6) Duration in the occupation: \_\_\_\_\_
- 7) Level of education: Primary  O'level  A'level  HND  BSc  MSc  PhD   
Diploma

### B- Sexuality

- 8) Age of first sexual intercourse \_\_\_\_\_
- 9) Have you ever had sex with someone you did not know (one-night stand)? Yes  No
- 10) Have you ever had sex with a prostitute? Yes  No
- 11) Have you had more than 10 sex partners in your lifetime? Yes  No

### C- Knowledge on HBV

- 12) Have you heard of hepatitis B viral infection before now? Yes  No
- 13) Can HBV be transmitted sexually? Yes  No
- 14) Can HBV be transmitted through kissing? Yes  No
- 15) Can HBV be transmitted from a mother to her unborn child? Yes  No
- 16) Can HBV be transmitted through contact with body fluid like blood? Yes  No

## Questionnaire

### D- Exposure to nosocomial infection

- 17) How often do you wear gloves when administering treatment? Rarely  Often
- 18) Have you ever pricked yourself while administering treatment? Yes  No
- 19) If yes, how often? Rarely  Often
- 20) What is your attitude towards HBV positive patients? Same as towards other patients   
Discreet and scared
- 21) How often do you wash your hand? After every patient  If I don't put on gloves   
When I remember
- 22) How often do you use a disinfectant? Rarely  Often

### E- Medical History

- 23) Have you been vaccinated against HBV? Yes  No
- 24) If yes, did you take the complete dose? Yes  No
- 25) How many times have you been tested for HBV? \_\_\_\_\_
- 26) Have you ever been tested positive for HBV? \_\_\_\_\_
- 27) Month and year \_\_\_\_\_

### F- Serology Result (Please do not fill)

HBsAg: \_\_\_\_\_

Thanks for your cooperation
